# Supplementary material for: Serum Advanced Glycation End Products and Their Soluble Receptor as New Biomarkers in Systemic Lupus Erythematosus
Source: MDPI journal article supplement (doi:10.3390/biomedicines12030610), 2024-03-07
Supplement: s1 [file s1]

## SUPPLEMENTARY MATERIAL

| Study                     | SLE:HC                          | SLE vs HC       | Type of AGE           | AGEs vs SLE characteristics                                                                        |
|---------------------------|---------------------------------|-----------------|-----------------------|----------------------------------------------------------------------------------------------------|
| <b>Serum AGEs</b>         |                                 |                 |                       |                                                                                                    |
| Rodríguez-García1998 [59] | 37:57                           | No              | Pentosidine           | –                                                                                                  |
| Nienhuis2008 [20]         | 10:10                           | No              | CEL, CML              | No differences                                                                                     |
| Nowak2021 [23]            | 31:26                           | Only as a group | CEL, CML, pentosidine | –                                                                                                  |
| Ene2021 [24]              | 38 LN<br>44 SLE non-LN<br>40 HC | Higher in SLE   | Pentosidine           | –                                                                                                  |
| Nisihara2021 [21]         | 79 SLE<br>No HC                 | –               | Pentosidine           | Lower pentosidine in skin discoid lesions and photo-sensitivity<br>No differences in SLEDAI or SDI |
| <b>Plasma AGEs</b>        |                                 |                 |                       |                                                                                                    |
| Chen2015 [22]             | 36:16                           | Higher in SLE   | AGEs                  | Positive correlation with SLEDAI                                                                   |

Supplementary Table S1: Previous works in the literature studying advanced glycation end-products (AGEs) in systemic lupus erythematosus (SLE) and their observations. *HC*: healthy controls; *IMT*: intimate media thickness; *CEL*: N $\xi$ -(carboxyethyl)lysine; *CML*: N $\xi$ -(carboxymethyl)lysine; *SLEDAI*: SLE disease activity index; *LN*: lupus nephritis; *SDI*: SLE damage index

| Study               | SLE:HC                                                                 | SLE vs HC                     | sRAGE vs SLE characteristics                                                                                                    |
|---------------------|------------------------------------------------------------------------|-------------------------------|---------------------------------------------------------------------------------------------------------------------------------|
| <b>Serum sRAGE</b>  |                                                                        |                               |                                                                                                                                 |
| Nienhuis2008 [20]   | 10:10                                                                  | Higher in quiescent SLE vs HC | Higher in active disease                                                                                                        |
| Lee2013 [29]        | 60 APS (35 SLE)                                                        | Higher in APS                 | –                                                                                                                               |
| Bayoumy2013 [26]    | 82 proliferative LN<br>53 non-proliferative LN<br>43 mixed LN<br>No HC | –                             | Lower in patients with poor response to therapy                                                                                 |
| Bobek2014 [25]      | 19:28                                                                  | Lower in SLE                  | Positive correlation with C4                                                                                                    |
| Manganelli2019 [30] | 60:22                                                                  | Higher in SLE                 | No difference in activity markers                                                                                               |
| Ene2021 [24]        | 38 LN<br>44 SLE non-LN<br>40 HC                                        | Lower in SLE                  | –                                                                                                                               |
| <b>Plasma sRAGE</b> |                                                                        |                               |                                                                                                                                 |
| Ma2012 [27]         | 120:40                                                                 | Lower in SLE                  | Higher in patients with skin rash, serositis or longer treatment<br>Negative correlation with WBC, lymphocytes, and neutrophils |
| Yu2015 [28]         | 105:43                                                                 | Lower in SLE                  | Higher in patients with longer treatment                                                                                        |
| Okuyucu2022 [60]    | 27:24                                                                  | Lower in SLE                  | Negative correlation with SLEDAI and lower patients with flare                                                                  |

Supplementary Table S2: Previous works in the literature studying the soluble receptor for advanced glycation end-products (sRAGE) in systemic lupus erythematosus (SLE) and their observations. *HC*: healthy controls; *APS*: antiphospholipid syndrome; *LN*: lupus nephritis; *WBC*: white blood count; *SLEDAI*: SLE disease activity index.

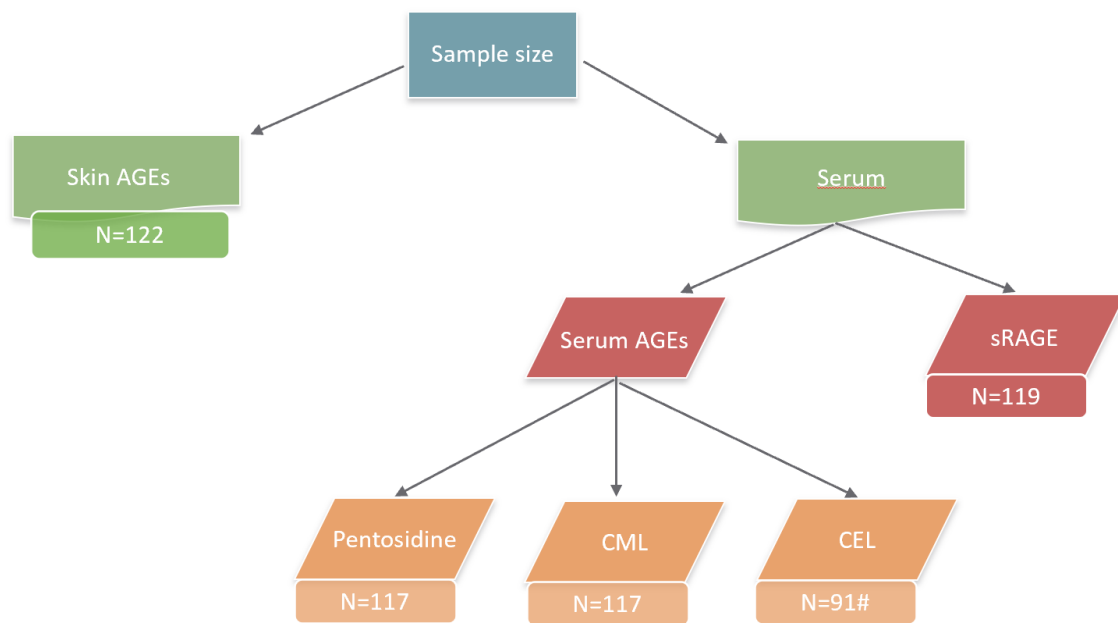

Supplementary Figure S1: Sample size for each of the analysis. \*For the comparison between patients with SLE and HC only 62 SLE patients could be included due to a younger mean age than HC and impossibility to age-match a higher number. Also, SLE patients with cardiovascular risk factors had to be excluded due to it being a criterion of exclusion in the HC. #: The sample size for analyzing CEL is reduced due to a shortage of the same ELISA kit. AGEs: *advanced glycation end-products*; SLE: *systemic lupus erythematosus*; HC: *healthy controls*; sRAGE: *soluble receptor for advanced glycation end-products*; CML: *N $\xi$ -(carboxymethyl)lysine*; CEL: *N $\xi$ -(carboxyethyl)lysine*.

Demographics like age, gender, and ethnicity.

Disease characteristics: All the criteria gathered in the 1997 ACR and 2012 SLICC SLE classificatory criteria were recorded, as well as other characteristics such as different ab or overlap with other SADs.

- Disease duration was assessed as a continuous variable and divided into 4 groups: 0-5, 6-10, 11-20 and  $\geq 20$  years since SLE diagnosis.
- Leukocyturia and hematuria were divided into 5 categories according to number of leukocytes/red blood cells detected per field (S0: none, S1: 0-5, S2: 5-10, S3: 10-20, S4: 20-50, S5:  $>50/\text{camp}$ ).
- Number of manifestations ever: the accumulated number of manifestations according to those included in the ACR or SLICC SLE classificatory criteria.

Treatment: all SLE treatments that patients were receiving at the moment of inclusion were recorded. We created 3 groups with treatment regimens progressively more intense: receiving no treatment or only glucocorticoids vs on antimalarials  $\pm$  glucocorticoids vs on immunosuppressants/biological drugs  $\pm$  antimalarials  $\pm$  glucocorticoids. We also recorded treatments for CVRF like antihypertensive or dyslipidemia drugs, antiplatelet or anticoagulant therapy.

Different indexes for measuring SLE activity and accrual damage:

- Physician global assessment (PGA): divided into  $<1$ ,  $[1-3]$ ,  $>3$  according to the sample's distribution.
- Patient global assessment (PtGA)  $\leq 3$  vs  $>3$ , categorized according to the nonlinear association observed in the scatter plot.
- Disease Activity Score 28 (DAS28): remission  $\leq 2.6$ , low (2.6-3.2], moderate (3.2-5.1] and high activity  $>5.1$ .
- SLE disease activity index 2000 (SLEDAI 2-K): remission=0, mild [0-4], moderate (4-11], severe  $>11$ . For statistical purposes we grouped patients in remission and with mild activity.
- SLE disease activity score (SLE-DAS) as a continuous variable. Remission  $\leq 2.08$ ; mild activity, (2.08-7.64]; moderate/severe activity  $>7.64$ .
- SLICC/American College of Rheumatology (SLICC/ACR) Damage Index (SDI), analyzed both as a quantitative variable, categorized in two groups (SDI 0 vs  $\geq 1$ ), and in three groups (0 vs 1 vs  $\geq 1$ ).
- IL-6 was measured using a Sandwich ELISA Kit provided by R&D Systems (Human IL-6 Quantikine, D6050); sensitivity 0.70 pg/mL; precision measured as coefficient of variation  $< 8\%$  (intra-assay),  $< 10\%$  (inter-assay).

PROs like the Health Assessment Questionnaire (HAQ) (divided into normal  $<0.3$ , mild [0.3-1.3], moderate (1.3-1.8], severe  $>1.8$ ), the Functional Assessment of Chronic Illness Therapy – Fatigue Scale (FACIT), and patient global assessment by a visual analogic scale (PtGA).

Cardiovascular variables:

- CVRF: presence of at least one: obesity ( $\text{BMI} > 30 \text{ Kg/m}^2$ ), AHT, DLP, CRD or hyperuricaemia. The smoking status was considered as a separate variable due to its high correlation with AGEs levels.
- Cardiovascular events (CVE): angina, myocardial infarction, cerebrovascular accident, peripheral arterial disease, intestinal ischemia, or ischemia of some other territory). CVRF&CVE indicates the presence of either/both CVRF or CVE ( $\text{CVRF}\&\text{CVE}>0$ ) or the sum ( $\text{CVRF}\&\text{CVE}$ ).
- CVE\_SDI: cardiovascular events assessed in the SDI (cerebral vascular accident, pulmonary infarction, angina or coronary bypass, myocardial infarction, venous thrombosis, or infarction of the gastrointestinal tract).

Supplementary Figure S2: Variables collected and their classification. *ACR*: American College of Rheumatology; *SLE*: systemic lupus erythematosus, *SLICC*: systemic lupus International Collaborating Clinics, *CVRF*: cardiovascular risk factors; *ab*: antibodies; *SADs*: systemic autoimmune diseases; *BMI*: body mass index; *AHT*: arterial hypertension; *DLP*: dislipidemia; *CRD*: chronic renal disease; *AGEs*: advance glycation end-products.

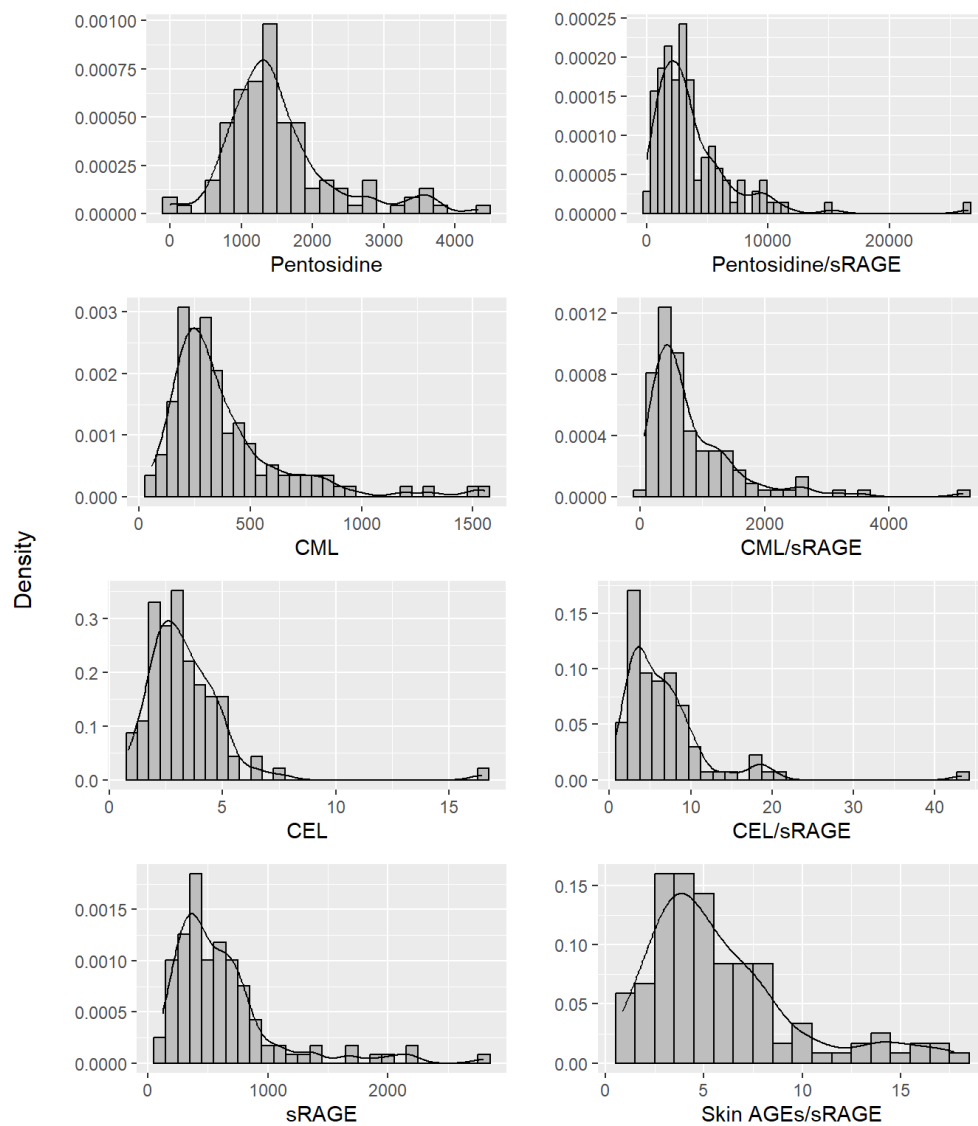

Supplementary Figure S1: Density graphics of serum advanced glycation end-products, their soluble receptor and their ratios showing their right-skewed distribution. *CML*: *N* $\xi$ -(carboxymethyl)lysine; *CEL*: *N* $\xi$ -(carboxyethyl)lysine; *sRAGE*: soluble receptor for advanced glycation end-products.

| Variables                                                              | First tertile<br>[ 0.1180]<br>N=39 | Second tertile<br>[1180,1594]<br>N=39 | Third tertile<br>[1594,4334]<br>N=39 | p-value |
|------------------------------------------------------------------------|------------------------------------|---------------------------------------|--------------------------------------|---------|
| Gender: Female                                                         | 36 (92.3%)                         | 36 (92.3%)                            | 37 (94.9%)                           | 0.815   |
| Age                                                                    | 52.1 (14.8)                        | 49.5 (15.5)                           | 51.1 (14.9)                          | 0.453   |
| Body mass index                                                        | 25.7 (5.03)                        | 25.9 (4.54)                           | 24.9 (4.87)                          | 0.474   |
| Ethnicity                                                              |                                    |                                       |                                      | 0.992   |
| Caucasian                                                              | 29 (74.4%)                         | 25 (64.1%)                            | 25 (64.1%)                           |         |
| Latin                                                                  | 8 (20.5%)                          | 8 (20.5%)                             | 11 (28.2%)                           |         |
| Other                                                                  | 2 (5.13%)                          | 6 (15.4%)                             | 3 (7.69%)                            |         |
| Years of duration                                                      | 8.00 [4.00;13.5]                   | 10.0 [2.50;17.5]                      | 10.0 [1.00;18.5]                     | 0.994   |
| Smoker                                                                 | 11 (28.2%)                         | 9 (23.1%)                             | 10 (25.6%)                           | 0.723   |
| <b>Classificatory Criteria and Other Clinical and Serological Data</b> |                                    |                                       |                                      |         |
| Constitutional symptoms                                                | 4 (10.3%)                          | 4 (10.3%)                             | 3 (7.69%)                            | 0.207   |
| Cutaneous                                                              | 25 (64.1%)                         | 34 (87.2%)                            | 28 (71.8%)                           | 0.725   |
| Photosensitivity                                                       | 21 (53.8%)                         | 25 (64.1%)                            | 25 (64.1%)                           | 0.305   |
| Oral ulcer                                                             | 17 (43.6%)                         | 17 (43.6%)                            | 14 (35.9%)                           | 0.160   |
| Alopecia                                                               | 13 (33.3%)                         | 20 (51.3%)                            | 19 (48.7%)                           | 0.883   |
| Arthritis                                                              | 28 (71.8%)                         | 32 (82.1%)                            | 29 (74.4%)                           | 0.346   |
| Serositis                                                              | 5 (12.8%)                          | 4 (10.3%)                             | 1 (2.56%)                            | 0.593   |
| Renal                                                                  | 3 (7.69%)                          | 4 (10.3%)                             | 1 (2.56%)                            | 0.228   |
| Neurological                                                           | 4 (10.3%)                          | 3 (7.69%)                             | 3 (7.69%)                            | 0.258   |
| Hematological                                                          | 33 (84.6%)                         | 26 (66.7%)                            | 24 (61.5%)                           | 0.333   |
| ANA+ ever                                                              | 39 (100%)                          | 39 (100%)                             | 39 (100%)                            |         |
| Anti-dsDNA+ ever                                                       | 23 (59.0%)                         | 26 (66.7%)                            | 25 (64.1%)                           | 0.179   |
| Anti-Sm+ ever                                                          | 8 (20.5%)                          | 10 (25.6%)                            | 3 (7.69%)                            | 0.199   |
| Anti-Ro60+ ever                                                        | 16 (41.0%)                         | 19 (48.7%)                            | 13 (33.3%)                           | 0.899   |
| Anti-Ro52+ ever                                                        | 11 (28.2%)                         | 9 (23.1%)                             | 7 (17.9%)                            | 0.186   |
| Low complement                                                         | 20 (51.3%)                         | 22 (56.4%)                            | 20 (51.3%)                           | 0.210   |
| Cardiac                                                                | 1 (2.56%)                          | 1 (2.56%)                             | 2 (5.13%)                            | 0.110   |
| Raynaud                                                                | 14 (35.9%)                         | 12 (31.6%)                            | 13 (33.3%)                           | 0.417   |
| APL antibodies carrier                                                 | 8 (20.5%)                          | 10 (25.6%)                            | 9 (23.1%)                            | 0.305   |
| APS                                                                    | 1 (2.56%)                          | 3 (7.69%)                             | 1 (2.56%)                            | 0.733   |
| Other SADs                                                             | 24 (61.5%)                         | 23 (59%)                              | 28 (71.8%)                           | 0.100   |
| <b>Serological Variables</b>                                           |                                    |                                       |                                      |         |
| CRP*                                                                   | 0.14 [0.08;0.32]                   | 0.18 [0.08;0.42]                      | 0.13 [0.08;0.31]                     | 0.869   |
| ESR*                                                                   | 13.0 [7.00;21.0]                   | 10.0 [5.00;18.0]                      | 9.00 [2.00;18.5]                     | 0.448   |
| Anti-dsDNA+*                                                           | 4.00 [2.00;15.8]                   | 5.00 [1.00;12.0]                      | 3.00 [1.00;12.5]                     | 0.551   |
| CH50*                                                                  | 58.7 [42.0;67.5]                   | 60.3 [48.2;72.8]                      | 62.2 [56.4;70.9]                     | 0.109   |
| C3*                                                                    | 105 (22.6)                         | 105 (22.4)                            | 109 (23.5)                           | 0.671   |
| C4*                                                                    | 18.8 (8.18)                        | 20.4 (9.80)                           | 20.5 (6.99)                          | 0.349   |
| IL-6*                                                                  | 2.90 [1.93;4.66]                   | 1.98 [1.55;3.53]                      | 2.32 [1.40;3.63]                     | 0.598   |
| <b>SLE Activity and Damage Indexes</b>                                 |                                    |                                       |                                      |         |
| DAS28                                                                  | 2.36 [1.68;3.11]                   | 2.02 [1.37;2.76]                      | 2.10 [1.33;3.25]                     | 0.698   |
| SLEDAI                                                                 | 4.00 [2.00;6.00]                   | 4.00 [2.00;6.00]                      | 4.00 [2.00;7.00]                     | 0.255   |
| SLE-DAS                                                                | 4.18 [1.78;7.28]                   | 1.79 [1.20;6.15]                      | 2.53 [0.82;4.86]                     | 0.087   |
| SDI                                                                    | 0.00 [0.00;1.00]                   | 1.00 [0.00;1.00]                      | 0.00 [0.00;1.00]                     | 0.587   |
| PGA                                                                    | 2.00 [1.00;3.00]                   | 2.00 [1.00;2.50]                      | 2.00 [1.00;3.00]                     | 0.565   |
| <b>Patient Reported Outcomes</b>                                       |                                    |                                       |                                      |         |
| FACIT                                                                  | 18.0 [13.0;28.0]                   | 18.0 [10.0;27.0]                      | 16.0 [9.50;26.0]                     | 0.386   |
| HAQ                                                                    | 0.50 [0.00;0.94]                   | 0.38 [0.00;0.88]                      | 0.31 [0.00;0.72]                     | 0.795   |
| PtGA                                                                   | 2.50 [1.00;5.00]                   | 3.00 [1.00;4.50]                      | 3.00 [1.00;4.75]                     | 0.368   |
| Pain VAS                                                               | 2.00 [0.00;6.25]                   | 2.00 [0.00;5.00]                      | 3.00 [0.00;6.00]                     | 0.926   |
| <b>Comorbidities and Cardiovascular Disease</b>                        |                                    |                                       |                                      |         |
| Hypertension                                                           | 9 (23.1%)                          | 9 (23.1%)                             | 8 (20.5%)                            | 0.929   |
| Dyslipidemia                                                           | 6 (15.4%)                          | 3 (7.69%)                             | 3 (7.69%)                            | 0.850   |
| Cardiovascular disease                                                 | 1 (2.56%)                          | 3 (7.69%)                             | 1 (2.56%)                            | 0.706   |

| Variables             | First tertile<br>[ 0,1180) | Second tertile<br>[1180,1594) | Third tertile<br>[1594,4334] | p-value |
|-----------------------|----------------------------|-------------------------------|------------------------------|---------|
| Chronic renal disease | 1 (2.56%)                  | 1 (2.56%)                     | 1 (2.56%)                    | 0.129   |
| Hyperuricemia         | 0 (0.00%)                  | 2 (5.13%)                     | 0 (0.00%)                    | 0.887   |
| Obesity               | 9 (23.1%)                  | 8 (20.5%)                     | 5 (12.8%)                    | 0.360   |
| CVRF >0               | 15 (38.5%)                 | 17 (43.6%)                    | 15 (38.5%)                   | 0.816   |
| CVRF                  |                            |                               |                              | 0.579   |
| 0                     | 24 (61.5%)                 | 22 (56.4%)                    | 24 (61.5%)                   |         |
| 1                     | 8 (20.5%)                  | 12 (30.8%)                    | 13 (33.3%)                   |         |
| 2                     | 4 (10.3%)                  | 4 (10.3%)                     | 2 (5.13%)                    |         |
| 3                     | 3 (7.69%)                  | 1 (2.56%)                     | 0 (0.00%)                    |         |
| CVE                   |                            |                               |                              | 0.249   |
| 0                     | 36 (92.3%)                 | 33 (84.6%)                    | 37 (94.9%)                   |         |
| 1                     | 3 (7.69%)                  | 4 (10.3%)                     | 0 (0.00%)                    |         |
| 2                     | 0 (0.00%)                  | 1 (2.56%)                     | 1 (2.56%)                    |         |
| 3                     | 0 (0.00%)                  | 1 (2.56%)                     | 1 (2.56%)                    |         |
| CVE_SDI_presence      | 2 (5.13%)                  | 5 (12.8%)                     | 2 (5.13%)                    | 0.944   |
| CVRF&CVE >0           | 15 (38.5%)                 | 17 (43.6%)                    | 16 (41.0%)                   | 0.518   |
| CVRF & CVE            |                            |                               |                              | 0.795   |
| 0                     | 24 (61.5%)                 | 22 (56.4%)                    | 23 (59.0%)                   |         |
| 1                     | 12 (30.8%)                 | 11 (28.2%)                    | 14 (35.9%)                   |         |
| 2                     | 3 (7.69%)                  | 4 (10.3%)                     | 1 (2.56%)                    |         |
| 3                     | 0 (0.00%)                  | 1 (2.56%)                     | 0 (0.00%)                    |         |
| 4                     | 0 (0.00%)                  | 1 (2.56%)                     | 1 (2.56%)                    |         |
| <b>Treatments</b>     |                            |                               |                              |         |
| Dyslipidemia drugs    | 5 (12.8%)                  | 5 (12.8%)                     | 4 (10.3%)                    | 0.749   |
| Antihypertensives     | 9 (23.1%)                  | 10 (25.6%)                    | 9 (23.1%)                    | 0.976   |
| Antimalarials         | 28 (71.8%)                 | 32 (82.1%)                    | 29 (74.4%)                   | 0.493   |
| cDMARD                | 6 (15.4%)                  | 6 (15.4%)                     | 4 (10.3%)                    | 0.591   |
| bDMARD                | 2 (5.13%)                  | 3 (7.69%)                     | 1 (2.56%)                    | 0.432   |
| Mycophenolic acid     | 9 (23.1%)                  | 6 (15.4%)                     | 4 (10.3%)                    | 0.493   |
| Cyclosporine: 0       | 39 (100%)                  | 39 (100%)                     | 39 (100%)                    |         |
| Azathioprine          | 8 (20.5%)                  | 3 (7.69%)                     | 7 (17.9%)                    | 0.933   |
| Cyclophosphamide: 0   | 39 (100%)                  | 39 (100%)                     | 39 (100%)                    |         |
| Treatment             |                            |                               |                              | 0.494   |
| Others                | 3 (7.69%)                  | 5 (12.8%)                     | 6 (15.4%)                    |         |
| Antimalarials         | 14 (35.9%)                 | 19 (48.7%)                    | 18 (46.2%)                   |         |
| Immunosuppressants    | 22 (56.4%)                 | 15 (38.5%)                    | 15 (38.5%)                   |         |
| <b>AGEs</b>           |                            |                               |                              |         |
| Skin AGEs             | 2.61 (0.61)                | 2.55 (0.69)                   | 2.43 (0.66)                  | 0.214   |
| CML                   | 277 [199;365]              | 320 [194;497]                 | 294 [234;460]                | 0.372   |
| CEL                   | 3.14 [2.33;4.18]           | 3.16 [2.04;3.73]              | 2.82 [2.38;4.33]             | 0.485   |
| sRAGE                 | 505 [369;790]              | 447 [317;751]                 | 556 [341;703]                | 0.342   |

Supplementary Table S3: Non-significant (p-value >0.1) demographic and disease characteristics of systemic lupus erythematosus patients and their distribution according to pentosidine tertiles in the exploratory analysis. "c" indicates variables which have been categorized as previously stated in the methodology section. \* Indicates values according to the blood test performed in the study. ANA: antinuclear antibodies; APL: antiphospholipid; APS: antiphospholipid syndrome; SADs: systemic autoimmune diseases; CRP: C-reactive protein; ESR: Erythrocyte sedimentation rate; CH50, C3 and C4: Complement CH50, C3 and C4; IL-6: interleukin 6; DAS28: disease activity score 28; SLEDAI: systemic lupus erythematosus disease activity index; SLE-DAS: systemic lupus erythematosus disease activity score; SDI: systemic lupus erythematosus damage index; PGA: physician global assessment; FACIT: functional assessment of chronic illness therapy; HAQ: health assessment questionnaire disability index; PtGA: patient global assessment; VAS: visual analogic scale; CVRF: cardiovascular risk factors (obesity = IMC > 30 Kg/m<sup>2</sup>, arterial hypertension, dyslipidemia, chronic renal disease or hyperuricaemia); CVE:



*cardiovascular events (angina, myocardial infarction, cerebrovascular accident, peripheral arterial disease, intestinal ischemia or ischemia of some other territory); CVE\_SDI: cardiovascular events assessed in the SLE damage index (cerebral vascular accident, pulmonary infarction, angina or coronary bypass, myocardial infarction, venous thrombosis or infarction of the gastrointestinal tract); cDMARD; Disease-modifying antirheumatic drugs; bDMARD: biological DMARD; AGEs: advanced glycation end products; CML: N $\xi$ -(carboxymethyl)lysine; CEL: N $\xi$ -(carboxyethyl)lysine; sRAGE: receptor for advanced glycation end-products.*

|             | <b>Estimate</b> | <b>2.5%</b> | <b>97.5%</b> | <b>t-value</b> | <b>p-value</b> |
|-------------|-----------------|-------------|--------------|----------------|----------------|
| (Intercept) | 1481.3214       | 1341.8941   | 1620.7487    | 21.0447        | 0.0000         |
| Pulmonary   | 1181.8786       | 507.4192    | 1856.3379    | 3.4710         | <b>0.0007</b>  |

Supplementary Table S4: Linear regression model showing associations between pentosidine levels and systemic lupus erythematosus variables. We only show the results that were statistically significant indicated by  $p < 0.05$  (bold).

| Variables                                                              | First tertile<br>[ 57.6, 240]<br>N=39 | Second tertile<br>[239.8, 383]<br>N=39 | Third tertile<br>[382.9,1555]<br>N=39 | p-value |
|------------------------------------------------------------------------|---------------------------------------|----------------------------------------|---------------------------------------|---------|
| Gender: Female                                                         | 34 (87.2%)                            | 37 (94.9%)                             | 38 (97.4%)                            | 0.417   |
| Age                                                                    | 50.3 (16.2)                           | 52.0 (14.3)                            | 50.3 (14.7)                           | 0.496   |
| Body mass index                                                        | 25.5 (5.23)                           | 25.9 (5.01)                            | 24.8 (4.20)                           | 0.311   |
| Smoker                                                                 | 11 (28.2%)                            | 12 (30.8%)                             | 8 (20.5%)                             | 0.127   |
| <b>Classificatory Criteria and Other Clinical and Serological Data</b> |                                       |                                        |                                       |         |
| Constitutional symptoms                                                | 3 (7.69%)                             | 3 (7.69%)                              | 4 (10.3%)                             | 0.564   |
| Cutaneous                                                              | 32 (82.1%)                            | 24 (61.5%)                             | 32 (82.1%)                            | 0.566   |
| Photosensitivity                                                       | 22 (56.4%)                            | 25 (64.1%)                             | 27 (69.2%)                            | 0.883   |
| Oral ulcers                                                            | 20 (51.3%)                            | 12 (30.8%)                             | 17 (43.6%)                            | 0.281   |
| Alopecia                                                               | 17 (43.6%)                            | 13 (33.3%)                             | 24 (61.5%)                            | 0.926   |
| Arthritis                                                              | 27 (69.2%)                            | 29 (74.4%)                             | 33 (84.6%)                            | 0.459   |
| Serositis                                                              | 3 (7.69%)                             | 4 (10.3%)                              | 2 (5.13%)                             | 0.554   |
| Neurological                                                           | 3 (7.69%)                             | 4 (10.3%)                              | 3 (7.69%)                             | 0.899   |
| Hematological                                                          | 24 (61.5%)                            | 31 (79.5%)                             | 28 (71.8%)                            | 0.480   |
| ANA+ ever                                                              | 39 (100%)                             | 39 (100%)                              | 39 (100%)                             |         |
| Anti-dsDNA+ ever                                                       | 19 (48.7%)                            | 28 (71.8%)                             | 26 (66.7%)                            | 0.587   |
| Anti-Sm+ ever                                                          | 7 (17.9%)                             | 4 (10.3%)                              | 10 (25.6%)                            | 0.205   |
| Anti-Ro60+ ever                                                        | 16 (41.0%)                            | 13 (33.3%)                             | 19 (48.7%)                            | 0.106   |
| Anti-Ro52+ ever                                                        | 10 (25.6%)                            | 7 (17.9%)                              | 10 (25.6%)                            | 0.208   |
| Low complement                                                         | 21 (53.8%)                            | 21 (53.8%)                             | 19 (48.7%)                            | 0.939   |
| Direct Coombs +                                                        | 1 (4.55%)                             | 4 (16.7%)                              | 4 (19.0%)                             | 0.242   |
| Pulmonary                                                              | 0 (0.00%)                             | 2 (5.13%)                              | 2 (5.13%)                             | 0.587   |
| Cardiac                                                                | 0 (0.00%)                             | 3 (7.69%)                              | 1 (2.56%)                             | 0.981   |
| Raynaud                                                                | 13 (33.3%)                            | 14 (35.9%)                             | 12 (30.8%)                            | 0.286   |
| APL antibodies carrier                                                 | 10 (25.6%)                            | 11 (28.2%)                             | 8 (20.5%)                             | 0.594   |
| APS                                                                    | 2 (5.13%)                             | 1 (2.56%)                              | 2 (5.13%)                             | 0.887   |
| Other SADs                                                             | 24 (61.5%)                            | 26 (66.7%)                             | 23 (59.0%)                            | 0.713   |
| <b>Serological Variables</b>                                           |                                       |                                        |                                       |         |
| CRP*                                                                   | 0.14 [0.08;0.38]                      | 0.16 [0.07;0.30]                       | 0.12 [0.08;0.34]                      | 0.497   |
| ESR*                                                                   | 9.00 [4.25;20.0]                      | 9.00 [5.00;16.8]                       | 13.0 [7.50;20.5]                      | 0.120   |
| Anti-dsDNA+*                                                           | 2.00 [1.00;9.00]                      | 3.00 [1.00;11.8]                       | 6.00 [2.00;20.5]                      | 0.675   |
| Anti-dsDNA>RV*                                                         | 7 (17.9%)                             | 11 (28.9%)                             | 18 (46.2%)                            | 0.135   |
| CH50*                                                                  | 67.2 [53.0;72.2]                      | 60.6 [53.1;68.2]                       | 58.6 [43.2;66.3]                      | 0.366   |
| C3*                                                                    | 107 (22.2)                            | 108 (21.3)                             | 104 (24.7)                            | 0.216   |
| C4*                                                                    | 19.5 (8.43)                           | 20.3 (7.18)                            | 19.8 (9.47)                           | 0.848   |
| IL-6*                                                                  | 2.28 [1.29;3.23]                      | 2.08 [1.84;3.01]                       | 3.43 [1.86;4.69]                      | 0.176   |
| <b>SLE Activity and Damage Indexes</b>                                 |                                       |                                        |                                       |         |
| DAS28                                                                  | 2.11 [1.28;3.09]                      | 2.10 [1.47;2.85]                       | 2.43 [1.74;3.31]                      | 0.270   |
| SLEDAI                                                                 | 4.00 [2.00;6.00]                      | 4.00 [2.00;6.00]                       | 5.00 [2.00;7.00]                      | 0.393   |
| SLE-DAS                                                                | 2.55 [1.20;6.19]                      | 3.55 [1.01;5.59]                       | 2.53 [1.78;7.18]                      | 0.470   |
| SDI                                                                    | 0.00 [0.00;1.00]                      | 0.00 [0.00;1.00]                       | 0.00 [0.00;1.00]                      | 0.297   |
| <b>Patient Reported Outcomes</b>                                       |                                       |                                        |                                       |         |
| FACIT                                                                  | 15.0 [9.50;26.5]                      | 20.0 [12.5;30.5]                       | 18.0 [10.0;25.5]                      | 0.930   |
| HAQ                                                                    | 0.25 [0.00;1.00]                      | 0.50 [0.00;0.94]                       | 0.31 [0.03;0.59]                      | 0.870   |
| PtGA                                                                   | 2.50 [1.00;5.00]                      | 3.00 [0.00;5.00]                       | 3.00 [1.50;5.00]                      | 0.974   |
| Pain VAS                                                               | 2.00 [0.00;6.25]                      | 3.00 [0.00;6.00]                       | 2.00 [0.00;5.50]                      | 0.810   |
| <b>Comorbidities and Cardiovascular Disease</b>                        |                                       |                                        |                                       |         |
| Hypertension                                                           | 7 (17.9%)                             | 10 (25.6%)                             | 9 (23.1%)                             | 0.536   |
| Dyslipidemia                                                           | 4 (10.3%)                             | 2 (5.13%)                              | 6 (15.4%)                             | 0.136   |
| Cardiovascular disease                                                 | 2 (5.13%)                             | 1 (2.56%)                              | 2 (5.13%)                             | 0.879   |
| Chronic renal disease                                                  | 1 (2.56%)                             | 1 (2.56%)                              | 1 (2.56%)                             | 0.953   |
| Hyperuricemia                                                          | 0 (0.00%)                             | 1 (2.56%)                              | 1 (2.56%)                             | 0.609   |
| Obesity                                                                | 7 (17.9%)                             | 9 (23.1%)                              | 6 (15.4%)                             | 0.421   |
| CVRF >0                                                                | 12 (30.8%)                            | 18 (46.2%)                             | 17 (43.6%)                            | 0.568   |

| Variables            | First tertile<br>[ 57.6, 240] | Second tertile<br>[239.8, 383] | Third tertile<br>[382.9,1555] | p-value |
|----------------------|-------------------------------|--------------------------------|-------------------------------|---------|
| CVRF                 |                               |                                |                               | 0.312   |
| 0                    | 27 (69.2%)                    | 21 (53.8%)                     | 22 (56.4%)                    |         |
| 1                    | 6 (15.4%)                     | 14 (35.9%)                     | 13 (33.3%)                    |         |
| 2                    | 5 (12.8%)                     | 3 (7.69%)                      | 2 (5.13%)                     |         |
| 3                    | 1 (2.56%)                     | 1 (2.56%)                      | 2 (5.13%)                     |         |
| CVE                  |                               |                                |                               | 0.160   |
| 0                    | 35 (89.7%)                    | 37 (94.9%)                     | 34 (87.2%)                    |         |
| 1                    | 4 (10.3%)                     | 1 (2.56%)                      | 2 (5.13%)                     |         |
| 2                    | 0 (0.00%)                     | 0 (0.00%)                      | 2 (5.13%)                     |         |
| 3                    | 0 (0.00%)                     | 1 (2.56%)                      | 1 (2.56%)                     |         |
| CVE_SDI_presence     | 2 (5.13%)                     | 2 (5.13%)                      | 5 (12.8%)                     | 0.848   |
| CVRF&CVE >0          | 12 (30.8%)                    | 18 (46.2%)                     | 18 (46.2%)                    | 0.417   |
| CVRF&CVE             |                               |                                |                               | 0.512   |
| 0                    | 27 (69.2%)                    | 21 (53.8%)                     | 21 (53.8%)                    |         |
| 1                    | 8 (20.5%)                     | 16 (41.0%)                     | 13 (33.3%)                    |         |
| 2                    | 4 (10.3%)                     | 1 (2.56%)                      | 3 (7.69%)                     |         |
| 3                    | 0 (0.00%)                     | 0 (0.00%)                      | 1 (2.56%)                     |         |
| 4                    | 0 (0.00%)                     | 1 (2.56%)                      | 1 (2.56%)                     |         |
| <b>Treatments</b>    |                               |                                |                               |         |
| Antihypertensives    | 7 (17.9%)                     | 10 (25.6%)                     | 11 (28.2%)                    | 0.380   |
| cDMARD               | 8 (20.5%)                     | 7 (17.9%)                      | 3 (7.69%)                     | 0.104   |
| bDMARD               | 1 (2.56%)                     | 2 (5.13%)                      | 3 (7.69%)                     | 0.548   |
| Antimalarials        | 33 (84.6%)                    | 26 (66.7%)                     | 29 (74.4%)                    | 0.459   |
| Tacrolimus           | 0 (0.00%)                     | 0 (0.00%)                      | 1 (2.56%)                     | 0.849   |
| Cyclosporine: 0      | 39 (100%)                     | 39 (100%)                      | 39 (100%)                     |         |
| Azathioprine         | 3 (7.69%)                     | 8 (20.5%)                      | 7 (17.9%)                     | 0.615   |
| Cyclophosphamide: 0  | 39 (100%)                     | 39 (100%)                      | 39 (100%)                     |         |
| Treatment            |                               |                                |                               | 0.257   |
| Non-IS               | 26 (66.7%)                    | 20 (51.3%)                     | 17 (43.6%)                    |         |
| IS                   | 13 (33.3%)                    | 19 (48.7%)                     | 22 (56.4%)                    |         |
| <b>AGEs</b>          |                               |                                |                               |         |
| Skin AGEs            | 2.41 (0.59)                   | 2.57 (0.57)                    | 2.65 (0.76)                   | 0.242   |
| Skin AGEs assessment |                               |                                |                               | 0.233   |
| <1SD                 | 3 (7.69%)                     | 2 (5.13%)                      | 0 (0.00%)                     |         |
| 1SD-Mean             | 6 (15.4%)                     | 4 (10.3%)                      | 3 (7.69%)                     |         |
| Mean                 | 1 (2.56%)                     | 2 (5.13%)                      | 1 (2.56%)                     |         |
| Mean->1SD            | 13 (33.3%)                    | 9 (23.1%)                      | 12 (30.8%)                    |         |
| >1SD                 | 16 (41.0%)                    | 22 (56.4%)                     | 23 (59.0%)                    |         |
| Pentosidine          | 1304 [970;1721]               | 1372 [1047;1797]               | 1408 [1182;1871]              | 0.372   |
| sRAGE                | 359 [245;514]                 | 716 [534;847]                  | 476 [354;676]                 | 0.859   |

Supplementary Table S5: Non-significant (p-value >0.1) demographic and disease characteristics of systemic lupus erythematosus patients and their distribution according to CML tertiles in the exploratory analysis. "c" indicates variables which have been categorized as previously stated in the methodology section. \* Indicates values according to the blood test performed in the study. ANA: antinuclear antibodies; APL: antiphospholipid; APS: antiphospholipid syndrome; SADs: systemic autoimmune diseases; CRP: C-reactive protein; ESR: erythrocyte sedimentation rate; RV: reference value; CH50, C3 and C4: Complement CH50, C3 and C4; IL-6: interleukin 6; DAS28: Disease activity score 28; SLEDAI: systemic lupus erythematosus disease activity index; SLE-DAS: systemic lupus erythematosus disease activity score; SDI: systemic lupus erythematosus damage index; PGA: physician global assessment; FACIT: functional assessment of chronic illness therapy; HAQ: health assessment questionnaire disability index; PtGA: patient global assessment; VAS: Visual analogic scale; CVRF: cardiovascular risk factors (obesity = IMC > 30 Kg/m<sup>2</sup>, arterial hypertension, dyslipidemia, chronic renal disease

*or hyperuricaemia); CVE: cardiovascular events (angina, myocardial infarction, cerebrovascular accident, peripheral arterial disease, intestinal ischemia or ischemia of some other territory); CVE\_SDI: cardiovascular events assessed in the SLE damage index (cerebral vascular accident, pulmonary infarction, angina or coronary bypass, myocardial infarction, venous thrombosis or infarction of the gastrointestinal tract); cDMARD: Disease-modifying antirheumatic drugs; bDMARD: biological DMARD; IS: immunosuppressants; AGEs: advanced glycation end products; SD: standard deviation; sRAGE: receptor for advanced glycation end-products;*

|                                       | OLS linear regression                                   | Gamma GLM                                              |
|---------------------------------------|---------------------------------------------------------|--------------------------------------------------------|
| <b>(Intercept)</b>                    | 332.806 ***<br>(CI=[274.336, 391.276],p = 0.000)        | 332.806 ***<br>(CI=[283.766, 381.845],p = 0.000)       |
| <b>Non-Caucasian ethnicities</b>      | 144.618 **<br>(CI=[42.021, 247.215], <b>p = 0.006</b> ) | 144.618 *<br>(CI=[31.953, 257.283], <b>p = 0.013</b> ) |
| <b>(Intercept)</b>                    | 244.217 ***<br>(CI=[174.929, 313.505],p = 0.000)        | 234.488 ***<br>(CI=[181.650, 287.326],p = 0.000)       |
| <b>Disease duration</b>               | 4.102 *<br>(CI=[0.290, 7.914], <b>p = 0.035</b> )       | 4.347 *<br>(CI=[0.558, 8.135], <b>p = 0.026</b> )      |
| <b>Non-Caucasian ethnicities</b>      | 100.640 *<br>(CI=[14.939, 186.340],p = 0.022)           | 128.964 **<br>(CI=[39.714, 218.213],p = 0.005)         |
| <b>Glucocorticoids</b>                | 153.386 **<br>(CI=[62.856, 243.915],p = 0.001)          | 202.328 **<br>(CI=[84.720, 319.937],p = 0.001)         |
| <b>(Intercept)</b>                    | 281.586 ***<br>(CI=[217.110, 346.062],p = 0.000)        | 307.334 ***<br>(CI=[244.084, 370.584],p = 0.000)       |
| <b>Anti-dsDNA 2nd tertile [2, 11)</b> | 92.224 *<br>(CI=[1.042, 183.407], <b>p = 0.047</b> )    | 66.477<br>(CI=[-33.876, 166.829],p = 0.197)            |
| <b>Anti-dsDNA 3r tertile [11,300]</b> | 124.908 **<br>(CI=[31.157, 218.660], <b>p = 0.009</b> ) | 129.480 *<br>(CI=[15.550, 243.410], <b>p = 0.028</b> ) |
| <b>(Intercept)</b>                    | 298.664 ***<br>(CI=[234.713, 362.615],p = 0.000)        | 300.312 ***<br>(CI=[240.613, 360.011],p = 0.000)       |
| <b>IL-6 2nd tertile [1.88, 3.24)</b>  | -31.427<br>(CI=[-119.805, 56.951],p = 0.482)            | -14.590<br>(CI=[-97.111, 67.930],p = 0.730)            |
| <b>IL-6 3d tertile [3.24,39.38]</b>   | 105.876 *<br>(CI=[16.522, 195.231], <b>p = 0.021</b> )  | 83.828<br>(CI=[-16.035, 183.690],p = 0.103)            |
| <b>Glucocorticoids</b>                | 129.405 **<br>(CI=[43.234, 215.577],p = 0.004)          | 231.524 ***<br>(CI=[106.488, 356.559],p = 0.000)       |
| <b>(Intercept)</b>                    | 302.059 ***<br>(CI=[255.371, 348.747],p = 0.000)        | 299.238 ***<br>(CI=[257.970, 340.505],p = 0.000)       |
| <b>Densitometric osteoporosis</b>     | 103.270 *<br>(CI=[0.093, 206.447], <b>p = 0.050</b> )   | 136.359 *<br>(CI=[11.680, 261.037], <b>p = 0.034</b> ) |
| <b>Non-Caucasian ethnicities</b>      | 88.636 *<br>(CI=[10.842, 166.431],p = 0.026)            | 102.513 *<br>(CI=[17.808, 187.218],p = 0.019)          |

Supplementary Table S6: Ordinary least squares linear regression and gamma generalized linear model showing associations found between CML and systemic lupus erythematosus characteristics adjusted by their confounders (in grey). We only show the results that were statistically significant. Bold indicates those p-values significant ( $p < 0.05$ ). \*\*\*  $p < 0.001$ ; \*\*  $p < 0.01$ ; \*  $p < 0.05$ . *Anti-dsDNA*: anti-dsDNA antibodies; *IL-6*: interleukin 6.

| Variables                                                       | First tertile<br>[0.823, 2.79] | Second tertile<br>[2.793, 4.56] | Third tertile<br>[4.564,31.68] | p-value |
|-----------------------------------------------------------------|--------------------------------|---------------------------------|--------------------------------|---------|
|                                                                 | N=38                           | N=37                            | N=16                           |         |
| Gender: Female                                                  | 35 (92.1%)                     | 35 (94.6%)                      | 16 (100%)                      | 0.636   |
| Age                                                             | 53.2 (14.1)                    | 52.4 (15.0)                     | 51.6 (11.8)                    | 0.702   |
| BMI                                                             | 26.3 (5.74)                    | 24.9 (3.77)                     | 25.3 (3.51)                    | 0.413   |
| Ethnicity                                                       |                                |                                 |                                | 0.210   |
| Caucasian                                                       | 23 (60.5%)                     | 26 (70.3%)                      | 13 (81.2%)                     |         |
| Other                                                           | 15 (39.5%)                     | 11 (29.7%)                      | 3 (18.8%)                      |         |
| Years of duration tertiles                                      |                                |                                 |                                | 0.144   |
| [ 0, 5)                                                         | 11 (28.9%)                     | 8 (21.6%)                       | 1 (6.25%)                      |         |
| [5,16)                                                          | 15 (39.5%)                     | 17 (45.9%)                      | 7 (43.8%)                      |         |
| [16,45]                                                         | 12 (31.6%)                     | 12 (32.4%)                      | 8 (50.0%)                      |         |
| Classificatory Criteria and Other Clinical and Serological Data |                                |                                 |                                |         |
| Constitutional symptoms                                         | 3 (7.89%)                      | 4 (10.8%)                       | 1 (6.25%)                      | 0.046   |
| Cutaneous                                                       | 29 (76.3%)                     | 28 (75.7%)                      | 14 (87.5%)                     | 0.714   |
| Oral ulcer                                                      | 18 (47.4%)                     | 12 (32.4%)                      | 10 (62.5%)                     | 0.604   |
| Alopecia                                                        | 17 (44.7%)                     | 18 (48.6%)                      | 6 (37.5%)                      | 0.513   |
| Arthritis                                                       | 30 (78.9%)                     | 29 (78.4%)                      | 14 (87.5%)                     | 0.415   |
| Serositis                                                       | 2 (5.26%)                      | 4 (10.8%)                       | 2 (12.5%)                      | 0.954   |
| Renal                                                           | 4 (10.5%)                      | 2 (5.41%)                       | 2 (12.5%)                      | 0.881   |
| Neurological                                                    | 4 (10.5%)                      | 4 (10.8%)                       | 1 (6.25%)                      | 0.576   |
| Hematological                                                   | 30 (78.9%)                     | 28 (75.7%)                      | 13 (81.2%)                     | 0.625   |
| ANA+ ever                                                       | 38 (100%)                      | 37 (100%)                       | 16 (100%)                      |         |
| Anti-dsDNA+ ever                                                | 23 (60.5%)                     | 26 (70.3%)                      | 14 (87.5%)                     | 0.025   |
| Anti-Sm+ ever                                                   | 5 (13.2%)                      | 6 (16.2%)                       | 6 (37.5%)                      | 0.142   |
| Low complement                                                  | 19 (50.0%)                     | 19 (51.4%)                      | 9 (56.2%)                      | 0.475   |
| Direct Coombs+                                                  | 1 (5.26%)                      | 3 (13.6%)                       | 3 (21.4%)                      | 0.853   |
| Pulmonary                                                       | 2 (5.26%)                      | 1 (2.70%)                       | 0 (0.00%)                      | 0.403   |
| Cardiac                                                         | 0 (0.00%)                      | 2 (5.41%)                       | 1 (6.25%)                      | 0.667   |
| Raynaud                                                         | 13 (34.2%)                     | 14 (38.9%)                      | 6 (37.5%)                      | 0.434   |
| APL antibodies carrier                                          | 9 (23.7%)                      | 7 (18.9%)                       | 6 (37.5%)                      | 0.862   |
| APS                                                             | 2 (5.26%)                      | 2 (5.41%)                       | 0 (0.00%)                      | 0.845   |
| Other SADs                                                      | 25 (65.8%)                     | 23 (62.2%)                      | 8 (50.0%)                      | 0.663   |
| Serological Variables                                           |                                |                                 |                                |         |
| CH50*                                                           | 59.8 [52.4;73.6]               | 62.8 [57.4;69.0]                | 61.4 [55.4;70.8]               | 0.765   |
| C4*                                                             | 20.5 (8.69)                    | 20.5 (7.51)                     | 17.9 (7.15)                    | 0.204   |
| SLE Activity and Damage Indexes                                 |                                |                                 |                                |         |
| DAS28                                                           | 2.11 [1.27;3.05]               | 2.25 [1.68;2.73]                | 2.39 [1.68;2.89]               | 0.345   |
| SLEDAI                                                          | 4.00 [0.00;7.50]               | 5.00 [2.00;6.00]                | 5.00 [3.50;9.00]               | 0.291   |
| SLE-DAS                                                         | 1.78 [0.82;5.84]               | 2.16 [0.82;4.93]                | 6.05 [3.60;7.94]               | 0.253   |
| SDI                                                             | 0.00 [0.00;1.00]               | 0.00 [0.00;1.00]                | 1.00 [0.00;1.25]               | 0.876   |
| PGA                                                             | 1.50 [1.00;2.00]               | 2.00 [1.00;3.00]                | 2.00 [1.00;3.00]               | 0.591   |
| Patient Reported Outcomes                                       |                                |                                 |                                |         |
| FACIT                                                           | 14.5 [10.0;23.8]               | 20.0 [16.0;29.0]                | 16.5 [10.8;26.8]               | 0.963   |
| HAQ                                                             | 0.25 [0.00;0.72]               | 0.62 [0.12;1.00]                | 0.38 [0.22;0.47]               | 0.937   |
| PtGA                                                            | 2.00 [1.00;4.75]               | 2.50 [1.00;5.00]                | 3.25 [2.00;5.00]               | 0.984   |
| Pain VAS                                                        | 2.00 [0.00;6.00]               | 3.00 [0.00;6.50]                | 3.00 [0.00;5.25]               | 0.526   |
| Comorbidities and Cardiovascular Disease                        |                                |                                 |                                |         |
| Hypertension                                                    | 10 (26.3%)                     | 8 (21.6%)                       | 3 (18.8%)                      | 0.547   |
| Dyslipidemia                                                    | 3 (7.89%)                      | 4 (10.8%)                       | 3 (18.8%)                      | 0.669   |
| Cardiovascular disease                                          | 2 (5.26%)                      | 2 (5.41%)                       | 1 (6.25%)                      | 0.837   |
| Chronic renal disease                                           | 0 (0.00%)                      | 1 (2.70%)                       | 0 (0.00%)                      | 0.762   |
| Hyperuricemia                                                   | 2 (5.26%)                      | 0 (0.00%)                       | 0 (0.00%)                      | 0.213   |
| Obesity                                                         | 10 (26.3%)                     | 4 (10.8%)                       | 2 (12.5%)                      | 0.387   |
| CVRF >0                                                         | 16 (42.1%)                     | 15 (40.5%)                      | 6 (37.5%)                      | 0.448   |
| CVRF                                                            |                                |                                 |                                | 0.383   |

| Variables            | First tertile<br>[0.823, 2.79] | Second tertile<br>[2.793, 4.56] | Third tertile<br>[4.564,31.68] | p-value |
|----------------------|--------------------------------|---------------------------------|--------------------------------|---------|
| 0                    | 22 (57.9%)                     | 22 (59.5%)                      | 10 (62.5%)                     |         |
| 1                    | 8 (21.1%)                      | 13 (35.1%)                      | 5 (31.2%)                      |         |
| 2                    | 7 (18.4%)                      | 2 (5.41%)                       | 0 (0.00%)                      |         |
| 3                    | 1 (2.63%)                      | 0 (0.00%)                       | 1 (6.25%)                      |         |
| CVE                  |                                |                                 |                                | 0.673   |
| 0                    | 33 (86.8%)                     | 33 (89.2%)                      | 15 (93.8%)                     |         |
| 1                    | 4 (10.5%)                      | 2 (5.41%)                       | 0 (0.00%)                      |         |
| 2                    | 1 (2.63%)                      | 1 (2.70%)                       | 0 (0.00%)                      |         |
| 3                    | 0 (0.00%)                      | 1 (2.70%)                       | 1 (6.25%)                      |         |
| CVE_SDI_presence     | 3 (7.89%)                      | 4 (10.8%)                       | 1 (6.25%)                      | 0.823   |
| CVRF&CVE >0          | 17 (44.7%)                     | 15 (40.5%)                      | 6 (37.5%)                      | 0.407   |
| CVRF&CVE             |                                |                                 |                                | 0.731   |
| 0                    | 21 (55.3%)                     | 22 (59.5%)                      | 10 (62.5%)                     |         |
| 1                    | 12 (31.6%)                     | 11 (29.7%)                      | 5 (31.2%)                      |         |
| 2                    | 5 (13.2%)                      | 2 (5.41%)                       | 0 (0.00%)                      |         |
| 3                    | 0 (0.00%)                      | 1 (2.70%)                       | 0 (0.00%)                      |         |
| 4                    | 0 (0.00%)                      | 1 (2.70%)                       | 1 (6.25%)                      |         |
| <b>Treatments</b>    |                                |                                 |                                |         |
| Dyslipidemia drugs   | 3 (7.89%)                      | 6 (16.2%)                       | 4 (25.0%)                      | 0.332   |
| Antihypertensives    | 10 (26.3%)                     | 10 (27.0%)                      | 3 (18.8%)                      | 0.510   |
| cDMARD               | 3 (7.89%)                      | 8 (21.6%)                       | 3 (18.8%)                      | 0.550   |
| bDMARD               | 0 (0.00%)                      | 3 (8.11%)                       | 3 (18.8%)                      | 0.180   |
| Antimalarials        | 29 (76.3%)                     | 25 (67.6%)                      | 14 (87.5%)                     | 0.256   |
| Tacrolimus           | 1 (2.63%)                      | 0 (0.00%)                       | 0 (0.00%)                      | 0.179   |
| Cyclosporine: 0      | 38 (100%)                      | 37 (100%)                       | 16 (100%)                      |         |
| Azathioprine         | 6 (15.8%)                      | 7 (18.9%)                       | 4 (25.0%)                      | 0.954   |
| Cyclophosphamide: 0  | 38 (100%)                      | 37 (100%)                       | 16 (100%)                      |         |
| <b>AGEs</b>          |                                |                                 |                                |         |
| Skin AGEs            | 2.46 (0.77)                    | 2.60 (0.53)                     | 2.74 (0.65)                    | 0.877   |
| Skin AGEs assessment |                                |                                 |                                | 0.388   |
| <1SD                 | 5 (13.2%)                      | 1 (2.70%)                       | 1 (6.25%)                      |         |
| 1SD-Mean             | 5 (13.2%)                      | 3 (8.11%)                       | 1 (6.25%)                      |         |
| Mean                 | 2 (5.26%)                      | 1 (2.70%)                       | 0 (0.00%)                      |         |
| Mean->1SD            | 13 (34.2%)                     | 11 (29.7%)                      | 3 (18.8%)                      |         |
| >1SD                 | 13 (34.2%)                     | 21 (56.8%)                      | 11 (68.8%)                     |         |
| Pentosidine          | 1337 [1029;1740]               | 1363 [1146;1580]                | 1343 [1042;2536]               | 0.485   |
| sRAGE                | 448 [335;671]                  | 562 [433;852]                   | 660 [546;977]                  | 0.919   |

Supplementary Table S7: Non-significant (p-value >0.1) demographic and disease characteristics of systemic lupus erythematosus patients and their distribution according to CEL tertiles in the exploratory analysis. "c" indicates variables which have been categorized as previously stated in the methodology section. \* Indicates values according to the blood test performed in the study. *BMI*: body mass index; *ANA*: antinuclear antibodies; *APL*: antiphospholipid; *APS*: antiphospholipid syndrome; *SADs*: systemic autoimmune diseases; *CH50* and *C4*: complement *CH50* and *C4*; *DAS28*: disease activity score 28; *SLEDAI*: systemic lupus erythematosus disease activity index; *SLE-DAS*: systemic lupus erythematosus disease activity score; *SDI*: systemic lupus erythematosus damage index; *PGA*: physician global assessment; *FACIT*: functional assessment of chronic illness therapy; *HAQ*: health assessment questionnaire disability index; *PtGA*: patient global assessment; *VAS*: visual analogic scale; *CVRF*: cardiovascular risk factors (obesity =  $IMC > 30 \text{ Kg/m}^2$ , arterial hypertension, dyslipidemia, chronic renal disease or hyperuricaemia); *CVE*: cardiovascular events (angina, myocardial infarction, cerebrovascular accident, peripheral arterial disease, intestinal ischemia or ischemia of some other territory); *CVE\_SDI*: cardiovascular events assessed in the SLE damage index (cerebral vascular accident, pulmonary infarction, angina or coronary bypass, myocardial infarction, venous thrombosis or infarction of the gastrointestinal tract);



*cDMARD: disease-modifying antirheumatic drugs; bDMARD: biological DMARD; AGEs: advanced glycation end products; SD: standard deviation; sRAGE: receptor for advanced glycation end-products.*

|                                      | OLS linear regression                               | Gamma GLM                                          |
|--------------------------------------|-----------------------------------------------------|----------------------------------------------------|
| <b>(Intercept)</b>                   | 1.873 ***<br>(CI=[0.851, 2.894],p = 0.000)          | 1.891 ***<br>(CI=[0.908, 2.874],p = 0.000)         |
| <b>Number of manifestations ever</b> | 0.162 *<br>(CI=[0.022, 0.302], <b>p = 0.024</b> )   | 0.161 *<br>(CI=[0.018, 0.303], <b>p = 0.030</b> )  |
| <b>Smoker</b>                        | 0.940 **<br>(CI=[0.313, 1.568],p = 0.004)           | 0.905 *<br>(CI=[0.145, 1.664],p = 0.022)           |
| <b>(Intercept)</b>                   | 2.847 ***<br>(CI=[2.517, 3.176],p = 0.000)          | 2.813 ***<br>(CI=[2.500, 3.127],p = 0.000)         |
| <b>Anti-dsDNA ab titer (IU/mL)</b>   | 0.015 *<br>(CI=[0.001, 0.030], <b>p = 0.042</b> )   | 0.018<br>(CI=[-0.000, 0.036],p = 0.058)            |
| <b>Smoker</b>                        | 0.886 **<br>(CI=[0.242, 1.531],p = 0.008)           | 0.907 *<br>(CI=[0.136, 1.678],p = 0.024)           |
| <b>(Intercept)</b>                   | 2.606 ***<br>(CI=[2.144, 3.069],p = 0.000)          | 2.606 ***<br>(CI=[2.213, 2.999],p = 0.000)         |
| <b>Positive anti-dsDNA ever</b>      | 0.619 *<br>(CI=[0.060, 1.178], <b>p = 0.030</b> )   | 0.620 *<br>(CI=[0.099, 1.141], <b>p = 0.022</b> )  |
| <b>Smoker</b>                        | 0.905 **<br>(CI=[0.271, 1.539],p = 0.006)           | 0.906 *<br>(CI=[0.134, 1.678],p = 0.024)           |
| <b>(Intercept)</b>                   | 2.666 ***<br>(CI=[2.269, 3.062],p = 0.000)          | 2.576 ***<br>(CI=[2.189, 2.963],p = 0.000)         |
| <b>IL-6 (pg/mL)</b>                  | 0.093 *<br>(CI=[0.016, 0.170], <b>p = 0.019</b> )   | 0.122 *<br>(CI=[0.023, 0.222], <b>p = 0.018</b> )  |
| <b>Smoker</b>                        | 1.084 ***<br>(CI=[0.458, 1.711],p = 0.001)          | 1.059 **<br>(CI=[0.334, 1.783],p = 0.005)          |
| <b>(Intercept)</b>                   | 2.543 ***<br>(CI=[2.085, 3.001],p = 0.000)          | 2.523 ***<br>(CI=[2.052, 2.995],p = 0.000)         |
| <b>CML (pg/mL)</b>                   | 0.002 ***<br>(CI=[0.001, 0.003], <b>p = 0.000</b> ) | 0.002 **<br>(CI=[0.001, 0.003], <b>p = 0.003</b> ) |

Supplementary Table S8: Ordinary least squares linear regression and gamma generalized linear model showing associations found between CEL and systemic lupus erythematosus characteristics adjusted by their confounders (in grey). We only show the results that were statistically significant. Bold indicates those p-values significant ( $p < 0.05$ ). \*\*\*  $p < 0.001$ ; \*\*  $p < 0.01$ ; \*  $p < 0.05$ . *ab*: antibodies; *IL-6*: interleukin 6; *CML*: *N*ξ-(carboxymethyl)lysine.

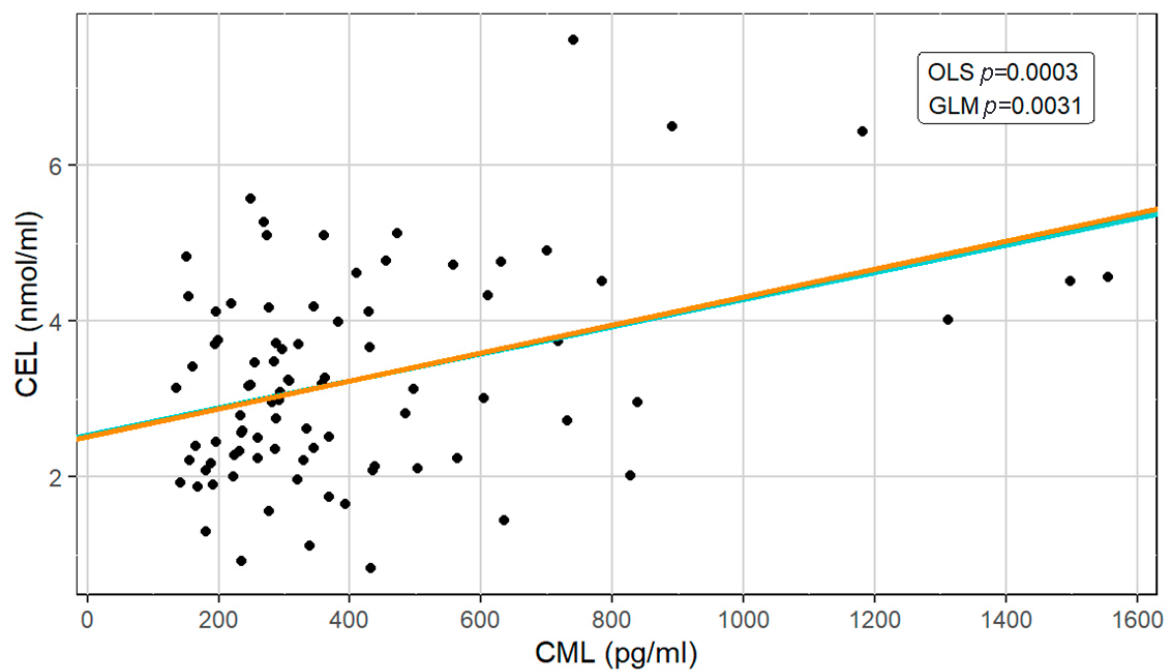

Supplementary Figure S2 Association between CEL and CML values. *CEL*: *N*ξ-(carboxyethyl)lysine; *CML*: *N*ξ-(carboxymethyl)lysine; *OLS*: ordinary least squares; *GLM*: generalized linear model.

| Variables                                                       | First tertile<br>[122, 384]<br>N=40 | Second tertile<br>[384, 671]<br>N=40 | Third tertile<br>[671,2797]<br>N=39 | p-value |
|-----------------------------------------------------------------|-------------------------------------|--------------------------------------|-------------------------------------|---------|
| Age                                                             | 48.0 (14.5)                         | 52.8 (16.1)                          | 51.4 (13.8)                         | 0.515   |
| Body mass index                                                 | 25.6 (5.67)                         | 25.0 (3.67)                          | 25.8 (4.87)                         | 0.401   |
| Ethnicity                                                       |                                     |                                      |                                     | 0.494   |
| Caucasian                                                       | 24 (60.0%)                          | 30 (75.0%)                           | 27 (69.2%)                          |         |
| Latin                                                           | 10 (25.0%)                          | 7 (17.5%)                            | 10 (25.6%)                          |         |
| Other                                                           | 6 (15.0%)                           | 3 (7.50%)                            | 2 (5.13%)                           |         |
| Years of duration tertiles                                      |                                     |                                      |                                     | 0.266   |
| [ 0, 5)                                                         | 20 (50.0%)                          | 12 (30.0%)                           | 10 (25.6%)                          |         |
| [5,16)                                                          | 14 (35.0%)                          | 12 (30.0%)                           | 15 (38.5%)                          |         |
| [16,45]                                                         | 6 (15.0%)                           | 16 (40.0%)                           | 14 (35.9%)                          |         |
| Smoker                                                          | 9 (22.5%)                           | 11 (27.5%)                           | 12 (30.8%)                          | 0.782   |
| Classificatory Criteria and Other Clinical and Serological Data |                                     |                                      |                                     |         |
| Constitutional symptoms                                         | 3 (7.50%)                           | 5 (12.5%)                            | 3 (7.69%)                           | 0.526   |
| Cutaneous                                                       | 31 (77.5%)                          | 32 (80.0%)                           | 26 (66.7%)                          | 0.383   |
| Oral ulcers                                                     | 15 (37.5%)                          | 19 (47.5%)                           | 16 (41.0%)                          | 0.624   |
| Alopecia                                                        | 18 (45.0%)                          | 22 (55.0%)                           | 14 (35.9%)                          | 0.358   |
| Arthritis                                                       | 28 (70.0%)                          | 30 (75.0%)                           | 33 (84.6%)                          | 0.205   |
| Serositis                                                       | 5 (12.5%)                           | 1 (2.50%)                            | 4 (10.3%)                           | 0.509   |
| Renal                                                           | 3 (7.50%)                           | 1 (2.50%)                            | 4 (10.3%)                           | 0.866   |
| Neurological                                                    | 4 (10.0%)                           | 4 (10.0%)                            | 2 (5.13%)                           | 0.666   |
| Hematological                                                   | 29 (72.5%)                          | 27 (67.5%)                           | 29 (74.4%)                          | 0.583   |
| ANA+ ever                                                       | 40 (100%)                           | 40 (100%)                            | 39 (100%)                           |         |
| Anti-dsDNA+ ever                                                | 25 (62.5%)                          | 21 (52.5%)                           | 29 (74.4%)                          | 0.171   |
| Anti-Sm+ ever                                                   | 8 (20.0%)                           | 5 (12.5%)                            | 8 (20.5%)                           | 0.970   |
| Anti-Ro60+ ever                                                 | 18 (45.0%)                          | 15 (37.5%)                           | 15 (38.5%)                          | 0.704   |
| Anti-Ro52+ ever                                                 | 11 (27.5%)                          | 7 (17.5%)                            | 9 (23.1%)                           | 0.998   |
| Low complement                                                  | 21 (52.5%)                          | 22 (55.0%)                           | 20 (51.3%)                          | 0.483   |
| Direct Coombs+                                                  | 2 (9.52%)                           | 3 (10.7%)                            | 4 (20.0%)                           | 0.105   |
| Pulmonary                                                       | 2 (5.00%)                           | 2 (5.00%)                            | 1 (2.56%)                           | 0.342   |
| Cardiac                                                         | 0 (0.00%)                           | 2 (5.00%)                            | 2 (5.13%)                           | 0.164   |
| Raynaud                                                         | 14 (35.0%)                          | 13 (33.3%)                           | 12 (30.8%)                          | 0.357   |
| APL antibodies carrier                                          | 9 (22.5%)                           | 13 (32.5%)                           | 7 (17.9%)                           | 0.628   |
| Other SADs                                                      | 22 (55.0%)                          | 24 (60.0%)                           | 29 (74.4%)                          | 0.840   |
| Serological Variables                                           |                                     |                                      |                                     |         |
| CRP*                                                            | 0.14 [0.08;0.46]                    | 0.16 [0.10;0.30]                     | 0.12 [0.06;0.27]                    | 0.209   |
| AntidsDNA>RV*                                                   | 11 (27.5%)                          | 10 (25.0%)                           | 15 (39.5%)                          | 0.393   |
| CH50*                                                           | 58.2 [44.0;71.3]                    | 60.3 [54.6;71.0]                     | 62.2 [53.5;70.4]                    | 0.167   |
| C3*                                                             | 106 (23.0)                          | 104 (18.9)                           | 108 (26.0)                          | 0.563   |
| C4*                                                             | 19.4 (9.43)                         | 19.5 (7.32)                          | 20.6 (8.20)                         | 0.904   |
| IL-6>RV*                                                        | 7 (18.4%)                           | 4 (10.0%)                            | 3 (7.89%)                           | 0.198   |
| SLE Activity and Damage Indexes                                 |                                     |                                      |                                     |         |
| SLEDAI                                                          | 4.00 [1.50;6.00]                    | 4.00 [2.00;6.00]                     | 4.00 [2.00;7.00]                    | 0.255   |
| SLE-DAS                                                         | 2.53 [1.20;6.85]                    | 3.59 [1.57;5.10]                     | 3.50 [1.57;5.66]                    | 0.616   |
| SDI                                                             | 0.00 [0.00;1.00]                    | 0.00 [0.00;1.00]                     | 0.00 [0.00;1.00]                    | 0.421   |
| PGA                                                             | 2.00 [1.00;2.00]                    | 2.00 [1.00;3.00]                     | 2.00 [1.00;3.00]                    | 0.928   |
| Patient Reported Outcomes                                       |                                     |                                      |                                     |         |
| FACIT                                                           | 16.0 [10.0;27.0]                    | 19.0 [11.5;28.0]                     | 15.0 [10.5;25.5]                    | 0.342   |
| cHAQ                                                            |                                     |                                      |                                     | 0.105   |
| Normal (<0.3)                                                   | 23 (57.5%)                          | 18 (45.0%)                           | 16 (42.1%)                          |         |
| Mild (<1.3)                                                     | 12 (30.0%)                          | 17 (42.5%)                           | 21 (55.3%)                          |         |
| Moderate (<1.8)                                                 | 4 (10.0%)                           | 1 (2.50%)                            | 1 (2.63%)                           |         |
| Serious                                                         | 1 (2.50%)                           | 4 (10.0%)                            | 0 (0.00%)                           |         |
| PtGA                                                            | 2.50 [1.00;4.25]                    | 2.75 [1.00;5.00]                     | 3.00 [1.00;5.00]                    | 0.771   |
| Comorbidities and Cardiovascular Disease                        |                                     |                                      |                                     |         |

| Variables              | First tertile<br>[122, 384] | Second tertile<br>[384, 671] | Third tertile<br>[671,2797] | p-value |
|------------------------|-----------------------------|------------------------------|-----------------------------|---------|
| Hypertension           | 7 (17.5%)                   | 9 (22.5%)                    | 10 (25.6%)                  | 0.777   |
| Dyslipidemia           | 3 (7.50%)                   | 5 (12.5%)                    | 4 (10.3%)                   | 0.466   |
| Cardiovascular disease | 0 (0.00%)                   | 4 (10.0%)                    | 1 (2.56%)                   | 0.777   |
| Chronic renal disease  | 1 (2.50%)                   | 1 (2.50%)                    | 1 (2.56%)                   | 0.782   |
| Hyperuricemia          | 2 (5.00%)                   | 0 (0.00%)                    | 0 (0.00%)                   | 0.247   |
| Obesity                | 9 (22.5%)                   | 6 (15.0%)                    | 7 (17.9%)                   | 0.352   |
| CVRF >0                | 16 (40.0%)                  | 15 (37.5%)                   | 16 (41.0%)                  | 0.964   |
| CVRF                   |                             |                              |                             | 0.947   |
| 0                      | 24 (60.0%)                  | 25 (62.5%)                   | 23 (59.0%)                  |         |
| 1                      | 11 (27.5%)                  | 11 (27.5%)                   | 11 (28.2%)                  |         |
| 2                      | 4 (10.0%)                   | 2 (5.00%)                    | 4 (10.3%)                   |         |
| 3                      | 1 (2.50%)                   | 2 (5.00%)                    | 1 (2.56%)                   |         |
| CVE                    |                             |                              |                             | 0.407   |
| 0                      | 35 (87.5%)                  | 35 (87.5%)                   | 38 (97.4%)                  |         |
| 1                      | 4 (10.0%)                   | 3 (7.50%)                    | 0 (0.00%)                   |         |
| 2                      | 1 (2.50%)                   | 1 (2.50%)                    | 0 (0.00%)                   |         |
| 3                      | 0 (0.00%)                   | 1 (2.50%)                    | 1 (2.56%)                   |         |
| CVRF&CVE >0            | 17 (42.5%)                  | 15 (37.5%)                   | 16 (41.0%)                  | 0.854   |
| CVRF&CVE               |                             |                              |                             | 0.537   |
| 0                      | 23 (57.5%)                  | 25 (62.5%)                   | 23 (59.0%)                  |         |
| 1                      | 12 (30.0%)                  | 10 (25.0%)                   | 15 (38.5%)                  |         |
| 2                      | 5 (12.5%)                   | 3 (7.50%)                    | 0 (0.00%)                   |         |
| 3                      | 0 (0.00%)                   | 1 (2.50%)                    | 0 (0.00%)                   |         |
| 4                      | 0 (0.00%)                   | 1 (2.50%)                    | 1 (2.56%)                   |         |
| <b>Treatments</b>      |                             |                              |                             |         |
| Dyslipidemia drugs     | 5 (12.5%)                   | 6 (15.0%)                    | 3 (7.69%)                   | 0.163   |
| Antihypertensives      | 7 (17.5%)                   | 11 (27.5%)                   | 10 (25.6%)                  | 0.834   |
| cDMARD                 | 6 (15.0%)                   | 7 (17.5%)                    | 5 (12.8%)                   | 0.386   |
| Tacrolimus             | 0 (0.00%)                   | 1 (2.50%)                    | 0 (0.00%)                   | 0.630   |
| Cyclosporine: 0        | 40 (100%)                   | 40 (100%)                    | 39 (100%)                   |         |
| Cyclophosphamide: 0    | 40 (100%)                   | 40 (100%)                    | 39 (100%)                   |         |
| <b>AGES</b>            |                             |                              |                             |         |
| Skin AGES              | 2.42 (0.67)                 | 2.57 (0.61)                  | 2.63 (0.67)                 | 0.867   |
| Skin AGES assessment   |                             |                              |                             | 0.574   |
| <1SD                   | 2 (5.00%)                   | 3 (7.50%)                    | 1 (2.56%)                   |         |
| 1SD-Mean               | 5 (12.5%)                   | 3 (7.50%)                    | 5 (12.8%)                   |         |
| Mean                   | 2 (5.00%)                   | 0 (0.00%)                    | 2 (5.13%)                   |         |
| Mean->1SD              | 12 (30.0%)                  | 13 (32.5%)                   | 9 (23.1%)                   |         |
| >1SD                   | 19 (47.5%)                  | 21 (52.5%)                   | 22 (56.4%)                  |         |
| CML                    | 233 [175;435]               | 335 [225;462]                | 301 [277;402]               | 0.859   |
| CEL                    | 2.57 [2.17;3.99]            | 3.15 [2.07;4.12]             | 3.25 [2.62;4.51]            | 0.919   |
| Pentosidine            | 1452 [1029;1737]            | 1368 [1040;1934]             | 1304 [1090;1710]            | 0.342   |

Supplementary Table Sg: Non-significant (p-value >0.1) demographic and disease characteristics of systemic lupus erythematosus patients and their distribution according to sRAGE tertiles in the exploratory analysis. "c" indicates variables which have been categorized as previously stated in the methodology section. \* Indicates values according to the blood test performed in the study. ANA: antinuclear antibodies; APL: antiphospholipid; SADs: systemic autoimmune diseases; CRP: C-reactive protein; RV: reference value; CH50, C3 and C4: Complement CH50, C3 and C4; IL-6: interleukin 6; DAS28: Disease activity score 28; SLEDAI: systemic lupus erythematosus disease activity index; SLE-DAS: systemic lupus erythematosus disease activity score; SDI: systemic lupus erythematosus damage index; PGA: physician global assessment; FACIT: functional assessment of chronic illness therapy; HAQ: health assessment questionnaire disability index; PtGA: patient global assessment; VAS: visual analogic scale; CVRF: cardiovascular risk factors (obesity = IMC > 30 Kg/m<sup>2</sup>, arterial

*hypertension, dyslipidemia, chronic renal disease or hyperuricaemia); CVE: cardiovascular events (angina, myocardial infarction, cerebrovascular accident, peripheral arterial disease, intestinal ischemia or ischemia of some other territory); CVE\_SDI: cardiovascular events assessed in the SLE Damage Index (cerebral vascular accident, pulmonary infarction, angina or coronary bypass, myocardial infarction, venous thrombosis or infarction of the gastrointestinal tract); cDMARD: disease-modifying antirheumatic drugs; CML: N $\xi$ -(carboxymethyl)lysine; CEL: N $\xi$ -(carboxyethyl)lysine; AGEs: advanced glycation end products; SD: standard deviation; sRAGE: receptor for advanced glycation end-products.*

|                              | OLS linear regression                                      | Gamma GLM                                                  |
|------------------------------|------------------------------------------------------------|------------------------------------------------------------|
| <b>(Intercept)</b>           | 675.659 ***<br>(CI=[580.002, 771.315],p = 0.000)           | 661.469 ***<br>(CI=[575.059, 747.880],p = 0.000)           |
| <b>Gender Male</b>           | -258.777 **<br>(CI=[-442.601, -74.952], <b>p = 0.007</b> ) | -278.148<br>(CI=[-570.268, 13.973],p = 0.062)              |
| <b>Glucocorticoids</b>       | -146.875<br>(CI=[-297.280, 3.529],p = 0.058)               | -149.658<br>(CI=[-318.314, 18.998],p = 0.081)              |
| <b>(Intercept)</b>           | 549.351 ***<br>(CI=[420.658, 678.043],p = 0.000)           | 566.784 ***<br>(CI=[458.581, 674.987],p = 0.000)           |
| <b>Photosensitivity ever</b> | 171.764 *<br>(CI=[20.756, 322.772],p = 0.026)              | 133.005 *<br>(CI=[1.860, 264.150],p = 0.049)               |
| <b>Gender Male</b>           | -194.269<br>(CI=[-483.549, 95.012], <b>p = 0.186</b> )     | -223.367 **<br>(CI=[-385.526, -61.209], <b>p = 0.008</b> ) |
| <b>Corticosteroid</b>        | -188.862 *<br>(CI=[-354.068, -23.655],p = 0.025)           | -124.170<br>(CI=[-255.604, 7.263],p = 0.067)               |
| <b>(Intercept)</b>           | 629.742 ***<br>(CI=[549.521, 709.964],p = 0.000)           | 624.089 ***<br>(CI=[543.477, 704.702],p = 0.000)           |
| <b>bDMARD</b>                | 700.624 ***<br>(CI=[378.761, 1022.487], <b>p = 0.000</b> ) | 646.896 *<br>(CI=[93.627, 1200.166], <b>p = 0.024</b> )    |
| <b>Glucocorticoids</b>       | -239.162 **<br>(CI=[-401.550, -76.774],p = 0.004)          | -210.665 **<br>(CI=[-336.505, -84.826],p = 0.001)          |
| <b>(Intercept)</b>           | 604.578 ***<br>(CI=[520.249, 688.908],p = 0.000)           | 599.723 ***<br>(CI=[524.638, 674.807],p = 0.000)           |
| <b>Mycophenolic acid</b>     | 361.566 ***<br>(CI=[167.792, 555.340], <b>p = 0.000</b> )  | 314.785 **<br>(CI=[103.233, 526.337], <b>p = 0.004</b> )   |
| <b>Glucocorticoids</b>       | -241.104 **<br>(CI=[-408.067, -74.140],p = 0.005)          | -198.645 **<br>(CI=[-319.486, -77.805],p = 0.002)          |

Supplementary Table S10: Ordinary least squares linear regression and gamma generalized linear model showing associations found between sRAGE and systemic lupus erythematosus characteristics adjusted by their confounders (in grey). We only show the results that were statistically significant. Bold indicates those p-values significant ( $p < 0.05$ ). \*\*\*  $p < 0.001$ ; \*\*  $p < 0.01$ ; \*  $p < 0.05$ . *bDMARD*: *biological disease-modifying antirheumatic drugs*.

| Variables               | First tertile<br>[ 0, 1878)<br>N=39 | Second tertile<br>[1878, 3673)<br>N=39 | Third tertile<br>[3673,26506]<br>N=39 | p-value          |
|-------------------------|-------------------------------------|----------------------------------------|---------------------------------------|------------------|
| Years of duration       | 11.0 [5.00;15.0]                    | 15.0 [3.00;21.0]                       | 3.00 [1.00;12.0]                      | <b>0.096</b>     |
| Anti-Ro52+ ever         | 8 (20.5%)                           | 9 (23.1%)                              | 10 (25.6%)                            | <b>0.062</b>     |
| Pulmonary               | 0 (0.00%)                           | 1 (2.56%)                              | 4 (10.3%)                             | <b>0.048</b>     |
| cTertile manifestations |                                     |                                        |                                       | <b>0.082</b>     |
| [3, 7)                  | 14 (35.9%)                          | 15 (38.5%)                             | 26 (66.7%)                            |                  |
| 7                       | 10 (25.6%)                          | 9 (23.1%)                              | 4 (10.3%)                             |                  |
| [8,12]                  | 15 (38.5%)                          | 15 (38.5%)                             | 9 (23.1%)                             |                  |
| Anti-Ro52+*             | 6 (15.8%)                           | 9 (23.1%)                              | 10 (26.3%)                            | <b>0.028</b>     |
| bDMARD                  | 5 (12.8%)                           | 1 (2.56%)                              | 0 (0.00%)                             | <b>0.078</b>     |
| AGEs                    | 2.60 [2.15;2.90]                    | 2.60 [2.05;3.05]                       | 2.40 [1.95;2.60]                      | <b>0.099</b>     |
| Pentosidine             | 1092 [833;1295]                     | 1337 [1034;1640]                       | 1875 [1480;2794]                      | <b>&lt;0.001</b> |
| sRAGE                   | 812 [660;1249]                      | 456 [381;637]                          | 315 [238;392]                         | <b>&lt;0.001</b> |

Supplementary Table S11: Variables that showed statistically significant (p-value <0.1) differences according to pentosidine/sRAGE tertiles in the exploratory analysis. "c" indicates variables which have been categorized as previously stated in the methodology section. \* Indicates values according to the blood test performed in the study. *b-DMARD*: biologic disease modifying antirheumatic-drugs; *AGEs*: advance glycation endo-products; *sRAGE*: receptor for advanced glycation end-products.



|             | OLS linear regression                                     | Gamma GLM                                                       |
|-------------|-----------------------------------------------------------|-----------------------------------------------------------------|
| (Intercept) | 3833.516 ***<br>(CI=[3186.695, 4480.337],p = 0.000)       | 3833.516 ***<br>(CI=[3190.114, 4476.919],p = 0.000)             |
| On bDMARD   | -2561.386<br>(CI=[-5417.671, 294.899],p = 0.078)          | -2561.386 ***<br>(CI=[-3682.685, -1440.086], <b>p = 0.000</b> ) |
| (Intercept) | 3350.850 ***<br>(CI=[2633.920, 4067.780],p = 0.000)       | 3350.850 ***<br>(CI=[2759.641, 3942.059],p = 0.000)             |
| Anti-Ro52+* | 1729.880 *<br>(CI=[192.236, 3267.524], <b>p = 0.028</b> ) | 1729.880<br>(CI=[-70.782, 3530.542],p = 0.062)                  |

Supplementary Table S12: Ordinary least squares linear regression and gamma generalized linear model showing associations found between pentosidine/sRAGE and systemic lupus erythematosus characteristics adjusted by their confounders (in grey). We only show the results that were statistically significant. Bold indicates those p-values significant ( $p < 0.05$ ). \*\*\*  $p < 0.001$ ; \*\*  $p < 0.01$ ; \*  $p < 0.05$ . \*Indicates values according to the blood test performed in the study. *bDMARD*: *biological disease-modifying antirheumatic drugs*.

| Variables          | First tertile<br>[ 66.5, 432)<br>N=39 | Second tertile<br>[432.1, 827)<br>N=39 | Third tertile<br>[826.9,5194]<br>N=39 | p-value          |
|--------------------|---------------------------------------|----------------------------------------|---------------------------------------|------------------|
| Ethnicity          |                                       |                                        |                                       | <b>0.029</b>     |
| Caucasian          | 30 (76.9%)                            | 29 (74.4%)                             | 20 (51.3%)                            |                  |
| Latin              | 7 (17.9%)                             | 7 (17.9%)                              | 13 (33.3%)                            |                  |
| Other              | 2 (5.13%)                             | 3 (7.69%)                              | 6 (15.4%)                             |                  |
| Ethnicity2         |                                       |                                        |                                       | <b>0.010</b>     |
| Caucasian          | 30 (76.9%)                            | 29 (74.4%)                             | 20 (51.3%)                            |                  |
| Other              | 9 (23.1%)                             | 10 (25.6%)                             | 19 (48.7%)                            |                  |
| GC                 | 3 (7.69%)                             | 8 (20.5%)                              | 19 (48.7%)                            | <b>&lt;0.001</b> |
| GC dosage          | 10.0 [8.75;11.2]                      | 5.00 [4.38;10.0]                       | 5.00 [2.50;8.75]                      | <b>0.091</b>     |
| Anti-Ro60+ ever    | 16 (41.0%)                            | 12 (30.8%)                             | 20 (51.3%)                            | <b>0.018</b>     |
| Anti-Ro52+ ever    | 7 (17.9%)                             | 9 (23.1%)                              | 11 (28.2%)                            | <b>0.026</b>     |
| Anti-Ro52+*        | 5 (13.2%)                             | 9 (23.7%)                              | 11 (28.2%)                            | <b>0.011</b>     |
| Hyperuricemia      | 0 (0.00%)                             | 0 (0.00%)                              | 2 (5.13%)                             | <b>0.041</b>     |
| Densitometric OP   | 4 (10.3%)                             | 4 (10.3%)                              | 10 (25.6%)                            | <b>0.095</b>     |
| Dyslipidemia drugs | 2 (5.13%)                             | 3 (7.69%)                              | 9 (23.1%)                             | <b>0.021</b>     |
| Anticoagulants     | 0 (0.00%)                             | 0 (0.00%)                              | 3 (7.69%)                             | <b>0.025</b>     |
| CML                | 273 [185;295]                         | 260 [205;345]                          | 510 [379;736]                         | <b>&lt;0.001</b> |
| sRAGE              | 778 [614;1220]                        | 462 [358;626]                          | 372 [265;466]                         | <b>&lt;0.001</b> |

Supplementary Table S123: Variables that showed statistically significant (p-value <0.1) differences according to CML/sRAGE tertiles in the exploratory analysis. "c" indicates variables which have been categorized as previously stated in the methodology section. \* Indicates values according to the blood test performed in the study. GC: glucocorticoids; OP: osteoporosis; CML: N $\xi$ -(carboxymethyl)lysine; sRAGE: receptor for advanced glycation end-products.

|                            | OLS linear regression                                    | Gamma GLM                                               |
|----------------------------|----------------------------------------------------------|---------------------------------------------------------|
| (Intercept)                | 652.287 ***<br>(CI=[512.290, 792.283],p = 0.000)         | 652.287 ***<br>(CI=[545.362, 759.212],p = 0.000)        |
| Ethnicity: non-Caucasian   | 446.441 ***<br>(CI=[201.842, 691.040],p = <b>0.000</b> ) | 446.441 **<br>(CI=[167.125, 725.758],p = <b>0.002</b> ) |
| (Intercept): SDI (sum=0)   | 503.773 ***<br>(CI=[333.758, 673.787],p = 0.000)         | 510.213 ***<br>(CI=[404.232, 616.195],p = 0.000)        |
| cSDI (sum=1)               | -30.764<br>(CI=[-294.986, 233.458],p = 0.818)            | 29.278<br>(CI=[-163.422, 221.978],p = 0.766)            |
| cSDI (sum>1)               | 358.614 *<br>(CI=[35.570, 681.658],p = <b>0.030</b> )    | 314.662<br>(CI=[-19.602, 648.926],p = 0.068)            |
| Glucocorticoids            | 381.902 **<br>(CI=[117.503, 646.301],p = 0.005)          | 396.364 *<br>(CI=[91.044, 701.684],p = 0.012)           |
| Ethnicity other            | 451.710 ***<br>(CI=[214.220, 689.201],p = 0.000)         | 390.731 **<br>(CI=[154.994, 626.467],p = 0.002)         |
| (Intercept)                | 547.907 ***<br>(CI=[399.062, 696.751],p = 0.000)         | 564.080 ***<br>(CI=[469.952, 658.209],p = 0.000)        |
| Densitometric osteoporosis | 508.853 **<br>(CI=[198.100, 819.607],p = <b>0.002</b> )  | 456.089 **<br>(CI=[117.263, 794.915],p = <b>0.010</b> ) |
| EthnicityOther             | 524.040 ***<br>(CI=[284.307, 763.772],p = 0.000)         | 492.828 ***<br>(CI=[246.113, 739.544],p = 0.000)        |
| (Intercept)                | 642.088 ***<br>(CI=[510.359, 773.817],p = 0.000)         | 653.954 ***<br>(CI=[541.291, 766.617],p = 0.000)        |
| Dyslipidemia drugs         | 387.215 *<br>(CI=[29.425, 745.004],p = <b>0.034</b> )    | 307.681<br>(CI=[-193.526, 808.888],p = 0.231)           |
| Glucocorticoids            | 438.857 **<br>(CI=[169.683, 708.031],p = 0.002)          | 419.836 *<br>(CI=[63.517, 776.155],p = 0.023)           |

Supplementary Table S14: Ordinary least squares linear regression and gamma generalized linear model showing associations found between CML/sRAGE and systemic lupus erythematosus characteristics adjusted by their confounders (in grey). We only show the results that were statistically significant. Bold indicates those p-values significant ( $p < 0.05$ ). \*\*\*  $p < 0.001$ ; \*\*  $p < 0.01$ ; \*  $p < 0.05$ . *SDI: Systemic Lupus International Collaborating Clinics/American College of Rheumatology (SLICC/ACR) Damage Index*; *CML: N $\xi$ -(carboxymethyl)lysine*; *sRAGE: receptor for advanced glycation end-products*.

| Variables                    | First tertile<br>[0.806, 3.77)<br>N=30 | Second tertile<br>[3.768, 7.20)<br>N=30 | Third tertile<br>[7.195,43.31]<br>N=30 | p-value |
|------------------------------|----------------------------------------|-----------------------------------------|----------------------------------------|---------|
| GC                           | 5 (16.7%)                              | 5 (16.7%)                               | 16 (53.3%)                             | 0.036   |
| Constitutional symptoms ever | 1 (3.33%)                              | 4 (13.3%)                               | 3 (10.0%)                              | 0.043   |
| Anti-Ro52+ ever              | 5 (16.7%)                              | 5 (16.7%)                               | 11 (36.7%)                             | 0.017   |
| CRP                          | 0.17 [0.07;0.32]                       | 0.11 [0.07;0.21]                        | 0.21 [0.12;0.47]                       | <0.001  |
| CRP tertiles                 |                                        |                                         |                                        | 0.015   |
| [0.03,0.12)                  | 11 (37.9%)                             | 15 (50.0%)                              | 6 (20.0%)                              |         |
| [0.12,0.28)                  | 10 (34.5%)                             | 10 (33.3%)                              | 10 (33.3%)                             |         |
| [0.28,3.92]                  | 8 (27.6%)                              | 5 (16.7%)                               | 14 (46.7%)                             |         |
| ESR                          | 10.0 [5.00;18.0]                       | 8.00 [5.00;13.0]                        | 13.0 [6.25;20.8]                       | 0.045   |
| Anti-dsDNA titers*           | 4.00 [1.00;11.0]                       | 1.00 [1.00;12.8]                        | 6.00 [2.00;34.5]                       | <0.001  |
| AntiRo52+ *                  | 4 (13.8%)                              | 5 (17.2%)                               | 10 (33.3%)                             | 0.011   |
| IL-6*                        | 2.38 [1.75;4.06]                       | 2.13 [1.48;2.91]                        | 3.17 [1.90;4.43]                       | 0.009   |
| IL-6>RV*                     | 1 (3.33%)                              | 3 (10.0%)                               | 6 (20.0%)                              | <0.001  |
| Antimalarials                | 20 (66.7%)                             | 21 (70.0%)                              | 26 (86.7%)                             | 0.036   |
| NSAIDs                       | 4 (13.3%)                              | 2 (6.67%)                               | 3 (10.0%)                              | 0.042   |
| CEL                          | 2.30 [1.78;3.22]                       | 2.90 [2.29;3.41]                        | 4.12 [3.48;4.89]                       | <0.001  |
| sRAGE                        | 870 [614;1382]                         | 561 [394;713]                           | 378 [271;499]                          | <0.001  |

Supplementary Table S13: Variables that showed statistically significant (p-value <0.1) differences according to CEL/sRAGE tertiles in the exploratory analysis. "c" indicates variables which have been categorized as previously stated in the methodology section. \* Indicates values according to the blood test performed in the study. GC: glucocorticoids; CRP: C-reactive protein; ESR: erythrocyte sedimentation rate; IL-6: interleukin 6; RV: reference value; NSAIDs: non-steroid anti-inflammatory drugs; CEL: N $\xi$ -(carboxyethyl)lysine; sRAGE: receptor for advanced glycation end-products.

|                        | OLS linear regression                              | Gamma GLM                                         |
|------------------------|----------------------------------------------------|---------------------------------------------------|
| <b>(Intercept)</b>     | 5.551 ***<br>(CI=[4.465, 6.638],p = 0.000)         | 5.514 ***<br>(CI=[4.513, 6.516],p = 0.000)        |
| <b>CRP</b>             | 2.607 *<br>(CI=[0.113, 5.101], <b>p = 0.041</b> )  | 2.800<br>(CI=[-0.006, 5.606],p = 0.054)           |
| <b>(Intercept)</b>     | 4.221 ***<br>(CI=[3.007, 5.436],p = 0.000)         | 4.485 ***<br>(CI=[3.337, 5.633],p = 0.000)        |
| <b>IL-6*</b>           | 0.362 **<br>(CI=[0.120, 0.604], <b>p = 0.004</b> ) | 0.287<br>(CI=[-0.040, 0.614],p = 0.089)           |
| <b>Glucocorticoids</b> | 3.274 ***<br>(CI=[1.489, 5.059],p = 0.000)         | 3.176 **<br>(CI=[1.001, 5.351],p = 0.005)         |
| <b>(Intercept)</b>     | 5.090 ***<br>(CI=[4.105, 6.075],p = 0.000)         | 4.842 ***<br>(CI=[4.183, 5.501],p = 0.000)        |
| <b>IL-6&gt;RV*</b>     | 3.440 *<br>(CI=[0.739, 6.140], <b>p = 0.013</b> )  | 3.544 *<br>(CI=[0.212, 6.875], <b>p = 0.040</b> ) |
| <b>Glucocorticoids</b> | 3.121 ***<br>(CI=[1.331, 4.912],p = 0.001)         | 3.336 ***<br>(CI=[1.485, 5.187],p = 0.001)        |

Supplementary Table S16: Ordinary least squares linear regression and gamma generalized linear model showing associations found between CEL/sRAGE and systemic lupus erythematosus characteristics adjusted by their confounders (in grey). We only show the results that were statistically significant. Bold indicates those p-values significant ( $p < 0.05$ ). \*\*\*  $p < 0.001$ ; \*\*  $p < 0.01$ ; \*  $p < 0.05$ . \*Indicates values according to the blood test performed in the study. *CRP*: C-reactive protein; *IL-6*: interleukin 6; *RV*: reference value; *CEL*: N $\xi$ -(carboxy-ethyl)lysine; *sRAGE*: receptor for advanced glycation end-products

| Variables                  | First tertile<br>[0.858, 3.76]<br>N=40 | Second tertile<br>[3.761, 6.55]<br>N=40 | Third tertile<br>[6.550,17.74]<br>N=39 | p-value          |
|----------------------------|----------------------------------------|-----------------------------------------|----------------------------------------|------------------|
| Gender: Female             | 39 (97.5%)                             | 38 (95.0%)                              | 34 (87.2%)                             | <b>0.027</b>     |
| Age                        |                                        |                                         |                                        | 0.114            |
| <40                        | 12 (30.0%)                             | 11 (27.5%)                              | 9 (23.1%)                              |                  |
| 40-60                      | 20 (50.0%)                             | 21 (52.5%)                              | 15 (38.5%)                             |                  |
| ≥ 60                       | 8 (20.0%)                              | 8 (20.0%)                               | 15 (38.5%)                             |                  |
| Years of duration          | 11.5 [4.00;16.0]                       | 12.0 [4.75;20.0]                        | 4.00 [1.00;13.5]                       | <b>0.088</b>     |
| cYears duration            |                                        |                                         |                                        | <b>0.059</b>     |
| 0-5                        | 12 (30.0%)                             | 14 (35.0%)                              | 21 (53.8%)                             |                  |
| 6-10                       | 7 (17.5%)                              | 5 (12.5%)                               | 4 (10.3%)                              |                  |
| 11-20                      | 14 (35.0%)                             | 12 (30.0%)                              | 7 (17.9%)                              |                  |
| >20                        | 7 (17.5%)                              | 9 (22.5%)                               | 7 (17.9%)                              |                  |
| Years of duration tertiles |                                        |                                         |                                        | <b>0.009</b>     |
| [ 0, 5)                    | 11 (27.5%)                             | 10 (25.0%)                              | 21 (53.8%)                             |                  |
| [5,16)                     | 17 (42.5%)                             | 14 (35.0%)                              | 10 (25.6%)                             |                  |
| [16,45]                    | 12 (30.0%)                             | 16 (40.0%)                              | 8 (20.5%)                              |                  |
| Photosensitivity ever      | 27 (67.5%)                             | 26 (65.0%)                              | 19 (48.7%)                             | <b>0.011</b>     |
| GC                         | 3 (7.50%)                              | 13 (32.5%)                              | 14 (35.9%)                             | <b>0.033</b>     |
| SDI                        | 0.00 [0.00;1.00]                       | 0.00 [0.00;1.00]                        | 0.00 [0.00;1.00]                       | <b>0.023</b>     |
| APS                        | 0 (0.00%)                              | 1 (2.50%)                               | 4 (10.3%)                              | <b>0.020</b>     |
| APS or APL antibodies+     | 0.00 [0.00;0.00]                       | 0.00 [0.00;1.00]                        | 0.00 [0.00;1.00]                       | <b>0.069</b>     |
| CRP                        | 0.11 [0.07;0.26]                       | 0.15 [0.12;0.26]                        | 0.18 [0.08;0.44]                       | <b>0.078</b>     |
| CRP tertiles               |                                        |                                         |                                        | <b>0.086</b>     |
| [0.03,0.12)                | 20 (51.3%)                             | 9 (22.5%)                               | 15 (38.5%)                             |                  |
| [0.12,0.28)                | 9 (23.1%)                              | 21 (52.5%)                              | 6 (15.4%)                              |                  |
| [0.28,3.92]                | 10 (25.6%)                             | 10 (25.0%)                              | 18 (46.2%)                             |                  |
| ANA+*                      | 37 (94.9%)                             | 37 (92.5%)                              | 35 (89.7%)                             | <b>0.062</b>     |
| IL-6>RV                    | 2 (5.00%)                              | 6 (15.4%)                               | 6 (16.2%)                              | <b>0.049</b>     |
| cHAQ                       |                                        |                                         |                                        | <b>0.006</b>     |
| Normal (<0.3)              | 16 (40.0%)                             | 19 (48.7%)                              | 22 (56.4%)                             |                  |
| Mild (<1.3)                | 23 (57.5%)                             | 16 (41.0%)                              | 11 (28.2%)                             |                  |
| Moderate (<1.8)            | 1 (2.50%)                              | 1 (2.56%)                               | 4 (10.3%)                              |                  |
| Serious                    | 0 (0.00%)                              | 3 (7.69%)                               | 2 (5.13%)                              |                  |
| CVE_SDI                    |                                        |                                         |                                        | <b>0.097</b>     |
| 0                          | 40 (100%)                              | 37 (92.5%)                              | 33 (84.6%)                             |                  |
| 1                          | 0 (0.00%)                              | 2 (5.00%)                               | 4 (10.3%)                              |                  |
| 2                          | 0 (0.00%)                              | 1 (2.50%)                               | 2 (5.13%)                              |                  |
| CVE_SDI presence           | 0 (0.00%)                              | 3 (7.50%)                               | 6 (15.4%)                              | <b>0.059</b>     |
| bDMARD                     | 4 (10.0%)                              | 2 (5.00%)                               | 0 (0.00%)                              | <b>0.047</b>     |
| Antimalarials              | 24 (60.0%)                             | 32 (80.0%)                              | 34 (87.2%)                             | <b>0.020</b>     |
| Antiplatelet drugs         | 6 (15.0%)                              | 15 (37.5%)                              | 12 (30.8%)                             | <b>0.061</b>     |
| Azathioprine               | 7 (17.5%)                              | 9 (22.5%)                               | 2 (5.13%)                              | <b>0.060</b>     |
| AGEs                       | 2.28 (0.50)                            | 2.53 (0.68)                             | 2.82 (0.66)                            | <b>&lt;0.001</b> |
| Assessment                 |                                        |                                         |                                        | <b>0.045</b>     |
| <1SD                       | 3 (7.50%)                              | 2 (5.00%)                               | 1 (2.56%)                              |                  |
| 1SD-Mean                   | 7 (17.5%)                              | 5 (12.5%)                               | 1 (2.56%)                              |                  |
| Mean                       | 2 (5.00%)                              | 1 (2.50%)                               | 1 (2.56%)                              |                  |
| Mean->1SD                  | 12 (30.0%)                             | 13 (32.5%)                              | 9 (23.1%)                              |                  |
| >1SD                       | 16 (40.0%)                             | 19 (47.5%)                              | 27 (69.2%)                             |                  |
| sRAGE                      | 807 [701;1210]                         | 521 [383;625]                           | 301 [238;372]                          | <b>&lt;0.001</b> |

Supplementary Table S147: Variables that showed statistically significant (p-value <0.1) differences according to skin AGEs/sRAGE tertiles in the exploratory analysis. "c" indicates variables which have been categorized as previously stated in the methodology section. \* Indicates values according to the blood test performed in the study. GC: glucocorticoids; SDI: systemic lupus erythematosus damage index; APS: antiphospholipid syndrome; APL: antiphospholipid antibodies; CRP: C-reactive protein; ANA: antinuclear antibodies; RV: reference value; HAQ: health assessment questionnaire; CVE\_SDI: cardiovascular events assessed in the SLE damage index (cerebral vascular accident, pulmonary infarction, angina or coronary bypass, myocardial infarction, venous thrombosis or infarction of the gastrointestinal tract); bDMARD: biologic disease-modifying antirheumatic drugs; AGEs: advanced glycation end-products; SD: standard deviation; sRAGE: receptor for advanced glycation end-products.

|                                              | OLS linear regression                                   | Gamma GLM                                                |
|----------------------------------------------|---------------------------------------------------------|----------------------------------------------------------|
| <b>(Intercept)</b>                           | 5.286 ***<br>(CI=[4.498, 6.074],p = 0.000)              | 5.247 ***<br>(CI=[4.527, 5.968],p = 0.000)               |
| <b>Gender: Male</b>                          | 2.854 *<br>(CI=[0.176, 5.532], <b>p = 0.037</b> )       | 3.069<br>(CI=[-0.943, 7.082],p = 0.136)                  |
| <b>Glucocorticoids</b>                       | 1.574 *<br>(CI=[0.029, 3.118],p = 0.046)                | 1.690<br>(CI=[-0.105, 3.484],p = 0.068)                  |
| <b>(Intercept)</b>                           | 6.6433 ***<br>(CI=[5.621, 7.666],p = 0.0000)            | 6.8620 ***<br>(CI=[5.633, 8.0910],p = 0.0000)            |
| <b>Years of duration 2nd tertile [5,16)</b>  | -2.652 ***<br>(CI=[-4.075, -1.229], <b>p = 0.0003</b> ) | -2.6390 ***<br>(CI=[-4.099, -1.178], <b>p = 0.0006</b> ) |
| <b>Years of duration 3rd tertile [16,45]</b> | -2.0700 **<br>(CI=[-3.549, -0.591], <b>p = 0.0065</b> ) | -2.3861 **<br>(CI=[-3.918, -0.854], <b>p = 0.0028</b> )  |
| <b>Glucocorticoids</b>                       | 2.0268 **<br>(CI=[0.647, 3.406],p = 0.0043)             | 2.1690 **<br>(CI=[0.647, 3.691],p = 0.0061)              |

Supplementary Table S18: Ordinary least squares linear regression and gamma generalized linear model showing associations found between skin AGEs/sRAGE and systemic lupus erythematosus characteristics adjusted by their confounders (in grey). We only show the results that were statistically significant. Bold indicates those p-values significant ( $p < 0.05$ ). \*\*\*  $p < 0.001$ ; \*\*  $p < 0.01$ ; \*  $p < 0.05$ . *RAGE: receptor for advanced glycation end-products.*
